Macrofauna of DeSoto Canyon and adjacent slope

1 **Macrofaunal Diversity and Community Structure of the DeSoto Canyon and Adjacent**  
2 **Slope**

3

4 Authors:

5

6 Arvind K. Shantharam<sup>1</sup>

7 Chih-Lin Wei, Institute of Oceanography<sup>2</sup>

8 Mauricio Silva, Florida State University<sup>1</sup>

9 Amy R. Baco\*, Florida State University<sup>1</sup>

10

11

12

13

14

15

16

17 \* - corresponding author, [abacotaylor@fsu.edu](mailto:abacotaylor@fsu.edu)

18 1. Department of Earth, Ocean, and Atmospheric Sciences, Florida State University, 1011

19 Academic Way, Tallahassee, FL 32306

20 2. Institute of Oceanography, National Taiwan University, Taipei 106, Taiwan

21

## Macrofauna of DeSoto Canyon and adjacent slope

22

### 23 **Abstract**

24 Macrofauna within the DeSoto Canyon, northern Gulf of Mexico (GOM), along the  
25 canyon wall and axis, and on the adjacent slope, were sampled along with sediment, terrain, and  
26 water mass parameters. Within the canyon, abundance and species richness decreased with  
27 depth, while evenness increased. Cluster analysis identified three depth-related groups within the  
28 canyon that conformed to previously established bathymetric boundaries: stations at 464 – 485  
29 m, 669 – 1834 m, and > 2000 m. Abundance differed between depth groups. Species richness  
30 was lowest for the deepest group and evenness was lowest for the shallowest. Community  
31 structure within the canyon most related to fluorometry and oxygen saturation, combined with  
32 any of salinity, particulate organic carbon, sediment organic carbon, or slope.

33 Canyon wall abundances were higher than the canyon axis or adjacent slope. Community  
34 structure differed between all three habitat types. Ordination of community structure suggests a  
35 longitudinal pattern that potentially tracks with increasing sea-surface chlorophyll that occurs in  
36 the eastward direction across the northern GOM. Canyon and slope differences may result from  
37 seasonal water masses entrained by canyon topography characterized by high salinity, oxygen  
38 saturation, fluorometry, and turbidity. Higher fluorescence and turbidity in the canyon did not  
39 translate into higher sediment organic matter. Flushing along canyon wall channels and the  
40 canyon axis may explain the low organic matter. Differences in abundance and structure between  
41 the canyon wall and axis may result from microhabitat heterogeneity due to potential  
42 hydrocarbon seepage, organically enriched sediment deposits along channels, or remnant  
43 influence from the Deepwater Horizon blowout.

## Macrofauna of DeSoto Canyon and adjacent slope

### 44 **1. Introduction**

45 Submarine canyons are one of the most common large-scale bathymetric features in  
46 oceanic basins around the world (Harris & Whiteway 2011). Over 9540 have been detected  
47 along continental margins (Harris et al. 2014). They are known as hotspots of benthic  
48 biodiversity and biomass, receiving increasing attention from deep-sea researchers (Rowe et al.  
49 1982, Houston & Haedrich 1984, Gerino et al. 1995, Maurer et al. 1995, Vetter & Dayton 1998,  
50 Sorbe 1999, Curdia et al. 2004, Tyler et al. 2009, De Leo et al. 2010, McClain & Barry 2010,  
51 Cunha et al. 2011a, Paterson et al. 2011, Hunter et al. 2013, Gunton et al. 2015, Harriague et al.  
52 2019). Through an interplay of local hydrography and canyon topography, canyons may channel  
53 currents and format upwelling (Klinck 1996, Hickey 1997, Canals et al. 2006), entrain  
54 particulate organic matter (Vetter 1994, Vetter & Dayton 1998, Harrold et al. 2003, Company et  
55 al. 2008, Rowe et al. 2008, De Leo et al. 2010, De Leo et al. 2012, Hunter et al. 2013), and  
56 transport shelf sediments to slopes in episodic turbidity currents or mass-wasting events (de  
57 Stigter et al. 2007, Oliveira et al. 2007, Arzola et al. 2008). This, in turn, concentrates diel  
58 vertical migrators (Greene et al. 1988, Lavoie et al. 2000, Genin 2004), and provides enhanced  
59 seafloor habitat heterogeneity (Yoklavich et al. 2000, Brodeur 2001, Uiblein et al. 2003, Vetter  
60 et al. 2010, De Leo et al. 2012).

61 High seafloor habitat heterogeneity in turn enhances canyon benthic biodiversity. It can  
62 create a patchwork availability of resources that result in gradients in density and faunal turnover  
63 on 1 m – 1 km spatial scales (McClain & Barry 2010, De Leo et al. 2014, Campanyà-Llovet et  
64 al. 2018). Entrained particulate organic matter accumulates and shifts in distribution within a  
65 canyon to structure faunal density, biodiversity, biomass, and community structure (Vetter &  
66 Dayton 1999, Curdia et al. 2004, Escobar-Briones et al. 2008). Topographically-induced

## Macrofauna of DeSoto Canyon and adjacent slope

67 hydrographic and biochemical regimes are important sources of continual disturbance and have  
68 been noted to elevate abundance, biomass, and species richness compared to adjacent non-  
69 canyon regions (Duineveld et al. 2001, De Leo et al. 2010, De Leo et al. 2014, Harriague et al.  
70 2019). All of this contributes to canyon denizens constituting a large proportion of marine  
71 metazoan benthic biodiversity and production (Gage 1996, Snelgrove 1999, Ebbe et al. 2010).

72 Submarine canyons located in the Gulf of Mexico (GOM) have received minimal  
73 attention in terms of the environmental and habitat heterogeneity and the effect these have on  
74 resident benthic macrofauna. What has been done has shown that major GOM depressions and  
75 canyons have high abundance and biomass, which has primarily been linked to large-scale  
76 processes such as the Mississippi River outflow, particulate organic matter flux, or grain  
77 (Baguley et al. 2006a, Baguley et al. 2006b, Escobar-Briones et al. 2008, Wei et al. 2012, Wei &  
78 Rowe 2019). This, however, does not account for more local scale processes and microhabitats  
79 that could strongly influence ecological processes affecting the macrobenthos.

80 The DeSoto Canyon, in the northeastern GOM, has been noted to contain high benthic  
81 decapod diversity (Wicksten & Packard 2005) and high abundances of infaunal organisms  
82 including both meiofauna (Baguley et al. 2006a) and macrofauna (Wei et al. 2010) compared to  
83 adjacent GOM sites. Macrofaunal biomass is also significantly higher in the canyon (Wei et al.  
84 2012) and has been attributed to the high amount of particulate organic carbon (POC) entrained  
85 there (Morse & Beazley 2008, Wei & Rowe 2019) and perhaps from the large amount of  
86 continental shelf export it receives (Hamilton et al. 2015). Highly productive habitats such as  
87 hydrocarbon seeps also occur in the canyon (Washburn et al. 2018). While the question of how  
88 benthic species richness differs in the canyon compared to the slope has been addressed (Wei et  
89 al. 2019), a comparison of community structure largely has not.

## Macrofauna of DeSoto Canyon and adjacent slope

90           The only previous study considering macrofaunal community structure of the DeSoto  
91 canyon was part of larger comprehensive investigations of the northern Gulf of Mexico (NGOM)  
92 macrobenthos, with a only a few samples collected in the canyon (Wei et al. 2010). Differences  
93 in canyon and slope community structure was not explicitly tested but comparisons can be  
94 inferred from the available data. The shallower of the canyon sites in that study, labeled S35, and  
95 a deeper canyon site, S36 clustered with non-canyon sites to the east and west, and were grouped  
96 into an “eastern mid-slope” zone. Similarly the deepest site in the canyon also clustered with  
97 non-canyon sites in its depth range (Wei et al 2010). These results suggest no difference within  
98 the canyon across a depth range of 1,721 m, nor between communities within the canyon  
99 compared to non-canyons sites. However, marine canyons are known to exhibit high amounts of  
100 beta diversity over small and large spatial scales for organisms in macrofaunal and megafaunal  
101 size classes (Schlacher et al. 2007, McClain & Barry 2010, Campanyà-Llovet et al. 2018). For  
102 example, Schlacher et al. (2007) reported highly restricted megafaunal sponge distributions in  
103 southeastern Australian canyons with 76% of species occupying a single site and 79% inhabiting  
104 single canyons. McClain & Barry (2010) observed high macrobenthic turnover (~40%) between  
105 open canyon sites and sites closer (< 100 m) to the cliff faces of Monterey Canyon. On even  
106 smaller spatial scales, 10s of m apart, Campanyà-Llovet et al. (2018) found distinct macrofauna  
107 communities in the Barkley Canyon.

108           These studies suggest a potential for significant spatial variability in macrofaunal  
109 communities within the DeSoto Canyon that may have been missed at the coarse sampling scales  
110 previously undertaken. Therefore, the goal of this study was to characterize finer-scale spatial  
111 variability in the DeSoto Canyon macrofauna, particularly among the canyon wall, axis, and  
112 adjacent slope, across a range of depths, by testing for differences between macrofaunal

## Macrofauna of DeSoto Canyon and adjacent slope

113 abundance, diversity, and community structure (1) within the canyon, (2) compared to the  
114 neighboring eastern slope; and (3) to identify environmental parameters driving the observed  
115 differences.

116

## 117 **2. Methods**

### 118 *2.1 DeSoto Canyon characteristics*

119 The DeSoto Canyon cuts into the northwest Florida shelf and slope, ranging in depth  
120 from 400 – 3200 m (Fig 1). It is thought to be an inactive Canyon (Uchupi & Emery 1968,  
121 Bouma 1972) and is noted as a transition zone in seafloor sediment type (Antoine & Bryant  
122 1968). Bottom substrate around the canyon to the west and east differs in size class and  
123 composition. To the west, sedimentation is dominated by siliclastic input from the Mississippi  
124 River. Bottom sediment primarily consists of quartz on the shelf, forming part of the Mississippi-  
125 Alabama-Florida Sand Sheet (Gould & Stewart 1955, Doyle & Sparks 1980). Continental slope  
126 sediments are rich in siliclastic clays and silts, in contrast to pelagic carbonate oozes that make  
127 up a majority of the deeper regions (Gould & Stewart 1955, Doyle & Sparks 1980, Balsam &  
128 Beeson 2003). East of the canyon, biogenic carbonate production highly influences  
129 sedimentation and forms the West Florida Sand Sheet on the mid-outer shelf, scaling down-slope  
130 to finer-grained West Florida Lime Mud (Doyle & Sparks 1980). Sediment accumulation rates  
131 range from ~17 cm/ky (Emiliani et al. 1975) in the northwest area of the canyon to ~10 cm/ky in  
132 the southeast (Emiliani et al. 1975, Nürnberg et al. 2008). When compensating for down-core  
133 compaction, accumulation rates reach 0.05 g/cm<sup>2</sup>/yr at ~1850 m (Yeager et al. 2004). Particulate

## Macrofauna of DeSoto Canyon and adjacent slope

134 organic carbon (POC) can reach ~0.67 - 1.67% of the top 18.5 cm of a core at depths of ~1850 m  
135 (Yeager et al. 2004, Morse & Beazley 2008).

136

### 137 *2.2 Biological sample collection and processing*

138         Sampling of ten sites within DeSoto Canyon was conducted as a part of the Gulf of  
139 Mexico Research Initiative (GOMRI) Deep-C Consortium during the May/June 2014 cruise  
140 aboard the *R/V Weatherbird II* cruise #WB1411 (Table 1, Figure 1). A comparable depth range  
141 of sampling sites was also targeted for the adjacent slope, but actual sampling was constrained by  
142 the compromises of a multi-PI cruise; thus, it was only possible to sample 3 non-canyon sites to  
143 the east of DeSoto Canyon. Sites within the DeSoto Canyon listed in Table 1 were selected to  
144 characterize spatial variability in canyon geomorphology, biogeochemistry, water column  
145 chemistry, and benthic communities along the canyon axis and canyon wall, following the 2010  
146 Deepwater Horizon oil spill (Coleman et al. 2014), and to include DeSoto Canyon sites S35 and  
147 S36 of Wei et al (2010). Non-canyon sites were selected to compare the ecological and  
148 biogeochemical properties of the canyon with the open slope at the same depths and also to act  
149 as a control site outside the potential benthic footprint of the 2010 Deepwater Horizon (DwH) oil  
150 spill (Garcia-Pineda et al. 2013, Chanton et al. 2014), and to include one of the slope sites east of  
151 DeSoto canyon in Wei et al (2010), S42, that was most similar to S35 and S36 in that study.

152         Three replicate deployments of an MC-800 Multicorer were conducted at each site. Each  
153 core had a diameter of 10 cm. Four cores from each deployment were sectioned on deck into 0-1,  
154 1-5, 5-10 cm fractions and preserved whole in 10% formalin. In the laboratory, preserved  
155 samples were sieved through 300  $\mu$ m mesh and then transferred to 70% ethanol. Macrofaunal



## Macrofauna of DeSoto Canyon and adjacent slope

156 organisms (*sensu stricto*) were sorted using a dissecting microscope and identified to the lowest  
157 taxon possible, usually to class or order, and the dominant groups of bivalves, amphipods,  
158 cumaceans, and polychaetes were identified to the family level. Family level identification is  
159 considered sufficient to discern multivariate patterns in deep-sea ecosystems (Warwick 1988,  
160 Somerfield & Clarke 1995, Gesteira et al. 2003). Meiofauna that were  $>300\ \mu\text{m}$  (e.g., nematodes  
161 and harpacticoid copepods) were also identified and enumerated but left at the phylum to class  
162 level and excluded from analysis.

163

### 164 *2.3 Sediment, water mass, and canyon terrain parameter measurement*

165 Water column properties including temperature, salinity, oxygen, fluorescence  
166 (chlorophyll and colored dissolved organic matter (CDOM)), and turbidity were measured using  
167 the conductivity-temperature-depth (CTD) rosette aboard the *R/V Weatherbird II* at standard  
168 depths every 0.25 seconds after deployment from the surface until  $\sim 10\ \text{m}$  off the seafloor.  
169 Bottom water conditions were obtained by averaging the parameters within ten meters of the  
170 bottom. Ocean-color data from (pixel size =  $\sim 1\ \text{km}^2$ ) were extracted from Visible Infrared  
171 Imaging Radiometer Suite (VIIRS) 8-day averages spanning mid-May to early June. Average  
172 surface chlorophyll concentration (SSC), photosynthetic aperture radar (PAR), and sea surface  
173 temperature (SST) were used as inputs to approximate depth-integrated net primary production  
174 (NPP) using a Vertical General Production Model (VGPM) (Behrenfeld & Falkowski 1997).  
175 Particulate organic carbon (POC) flux was approximated from NPP employing the exponential  
176 decay model of Lutz et al. (2007). More detailed methods on the ocean color data for the Gulf of  
177 Mexico are provided in Biggs et al. (2008).



## Macrofauna of DeSoto Canyon and adjacent slope

178 Sediment parameters of total organic carbon (TOC), total organic nitrogen (TON), and  
179 grain size were measured from the 0-5 cm depth section of a spare core from each deployment  
180 using a 30-cc syringe. Carbon and nitrogen samples were treated with 10% HCl to remove  
181 carbonates. Subsequently, samples were freeze dried, ground, and sealed in tin cups for  
182 combustion in a ThermoQuest CE Instrument NC2500 Analyzer. Percent carbon and nitrogen  
183 were measured on a Thermo Fischer Scientific Delta Plus XP Isotope Ratio Mass Spectrometer.  
184 Grain size subsamples of the same sediment core were taken from 0-5 cm and measured whole  
185 for granulometry. The samples were dried to in an oven at 100°C overnight, ground to a powder,  
186 and then treated with 15 ml 30% H<sub>2</sub>O<sub>2</sub> and 15 ml 10% HCl to remove organic matter and  
187 carbonates respectively (Jackson 1969). The powdered sediment was then suspended in water  
188 and the grain size distribution was measured via laser diffraction using a Mastersizer 2000MU  
189 Hydro. The samples were characterized by their percent clay (<8 µm), silt (8-63 µm), and sand  
190 (>63 µm) volume proportions, defined after Konert and Vandenberghe (1997). Characteristics of  
191 the canyon sediment surface including slope, aspect, and rugosity (surface roughness) were  
192 derived from the bathymetry layer using the Benthic Terrain Modeler Tool (Rinehart et al. 2004)  
193 in ArcMap 10.6.1. Slope was calculated in degrees using the 3 x 3 cell window (Burrough et al.  
194 2015). Aspect calculates the downslope direction, measured clockwise in degrees from 0 (north)  
195 to 360 (north) of each cell in relationship to its neighbors. It is derived from the z (bathymetry)  
196 values in a 3 x 3 cell window (Burrough et al. 2015). As a circular variable, it was converted into  
197 two parameters, northness (computed as cos(aspect)) and eastness (computed as sin(aspect)).  
198 These parameters characterize sites that took a north-south aspect and sites of an east-west  
199 aspect. A full list of environmental variables with data ranges can be found in Table 2.

200

## Macrofauna of DeSoto Canyon and adjacent slope

### 201 2.4 Statistical comparisons

202 For all statistical analyses, the four cores from each deployment were combined as one  
203 sample, with the deployments as the replicates for that site. The sampling constraints described  
204 above resulted in the range of depths of the non-canyon sites being only a subset of the depths  
205 sampled within the canyons. This prevented a balanced design for a comparison of within  
206 canyon vs. non-canyon sites and so data were analyzed in two phases. Since depth (and its  
207 correlates) is known to be a strong structuring factor in the deep sea (reviewed in Rex and Etter  
208 2010), in phase I all the sampling stations within the canyon (depth range 464 – 2290 m) were  
209 analyzed, to determine the depth structuring of the canyon communities. Then, to avoid the  
210 confounding of depth, in phase II all samples in the depth group determined in phase I that  
211 overlapped with the sampled depth range of the non-canyon sites (771- 978 m), were used in the  
212 comparisons among canyon wall, canyon axis, and adjacent non-canyon slope habitat types.

213 Differences in macrofaunal community abundances and diversity metrics were tested as a  
214 product of the following fixed factors in a one-way design: (1) *a posteriori* canyon depth groups  
215 (464 – 485 m vs 669 – 1834 m vs > 2000 m) and (2) habitat type (canyon wall vs canyon axis vs  
216 slope). Due to the large differences in sample size among depth and habitat groups, non-  
217 parametric Kruskal-Wallis tests were conducted to test for differences, with Bonferoni-adjusted  
218 Dunn's pairwise post-hoc analysis.

219 For multivariate analysis, community structure was depicted via cluster analysis and non-  
220 metric multidimensional scaling (NMDS). ANOSIM, based on Bray-Curtis similarity, was used  
221 to test the *a priori* habitat types in phase II. Due to the imbalance in sample size between habitat  
222 types (canyon axis and slope sites outnumber the canyon wall sites in this depth range), biases  
223 may be encountered in the ANOSIM (Anderson & Walsh 2013), thus samples were removed

## Macrofauna of DeSoto Canyon and adjacent slope

224 from the largest groups at random to match the smallest group. To ascertain which taxa were  
225 driving observed differences between communities in each habitat type, a similarity percentage  
226 (SIMPER) analysis was employed. Distance-based linear modeling (DISTLM) (Anderson et al.  
227 2008), was used to find the optimal combination of abiotic factors that significantly correlated  
228 with community structure. Prior to DISTLM analyses, environmental variables were normalized  
229 and plotted pairwise using draftsmen plots. Log-transformations were applied to highly skewed  
230 individual variables and highly collinear factors (>90%) removed. Interpolation of the  
231 environmental parameters was conducted to replace missing replicates and to run analyses.  
232 Environmental variables were first analyzed individually (marginal tests) and then the *BEST*  
233 selection procedure was employed to select the optimal model based on the small sample  
234 adjusted Akaike Information Criterion (AICc) for all possible combinations of environmental  
235 predictor variables. AICc was employed because it was formulated to deal with situations where  
236 the number of observations (N) to the number of variables (v) is < 40 (Burnham & Anderson  
237 2004) as in the case of this dataset (N = 39, v ≤ 13, N/v = 3.0).

238 The environmental data used for the input into the DISTLM was not the same for both  
239 phases of analyses. The DISTLM for the phase I within canyon analyses included all sediment,  
240 water mass, and terrain parameters. However, slope and terrain were unavailable for the non-  
241 canyon slope sites because high-resolution bathymetry was not available (Table 2), so terrain  
242 parameters were not included for the canyon axis vs. wall vs. slope DISTLM in phase II.

243 For all tests, differences at  $p < 0.05$  were considered significant. All statistical  
244 comparisons were conducted in R (R Core Team, 2019) and multivariate analyses were  
245 conducted using in PRIMER v 7.0.13 (Clarke & Gorley 2015).

246

## Macrofauna of DeSoto Canyon and adjacent slope

### 247 3. Results

#### 248 3.1 Macrofaunal abundance and diversity within the DeSoto canyon

249 Within the DeSoto Canyon, a total of 6637 individuals were identified to the lowest  
250 taxonomic level possible, most often family. Polychaetes (49.09 – 77.84%) were the most  
251 abundant taxonomic group, followed by tanaids (2.27 – 16.46%), bivalves (2.84 – 13.53%),  
252 nemertean worms (2.32 – 5.80%), and amphipods (0.32 – 4.88%) (Table 3). Groups with  
253 otherwise low individual proportions, when aggregated to the phylum and subphylum level,  
254 exhibit large relative abundance. These include other molluscs (scaphopods, gastropods, and  
255 cavoliniids), which contained proportions 2.37 – 16.99%, and other crustaceans (isopods and  
256 cumaceans), which had a relative abundance of 0.23 – 17.99%. Relative contribution from each  
257 taxonomic group changed by site (Table 3). Anomalously high abundances compared to the  
258 mean were found for bivalves at XC3, other molluscs at XC2, and for tanaids at PM and S35.  
259 S36, PM and XC4 had high values for other crustaceans compared to the other sites.

260 By depth, the highest average abundance was observed at 485 m with a continual  
261 decrease throughout the canyon (Fig 2A). A significant relationship was found with depth ( $p =$   
262 0.003). Mean richness formed a significant ( $p = 0.0006$ ) parabolic relationship with depth  
263 reaching a maximum around 1100 m (Fig 2B). Average Pielou's evenness increased with depth,  
264 ranging between 0.75 – 0.90 (Fig 2C) and was also found to have a significant increase with  
265 depth ( $p = 0.044$ ).

266

#### 267 3.2 Community structure within the DeSoto Canyon

## Macrofauna of DeSoto Canyon and adjacent slope

268 Three depth assemblages were identified through the cluster analysis of the within  
269 canyon macrofauna (Fig 3A) and depicted via non-metric multidimensional scaling (Fig 3B):  
270 Assemblage Group I included the shallowest canyon sites (464 – 485 m), Group II included the  
271 bulk of the canyon sites (670 – 1834 m), and Assemblage Group III included the deepest sites (>  
272 2000 m). Among these *a posteriori* depth groups, all main effect tests of abundance and within  
273 canyon diversity metrics showed significant differences overall (Fig. 4). Abundance was  
274 significantly different among all pairs of depth groups (Fig 4A). Pairwise comparison of depth  
275 groups for species richness only found differences for the > 2000 m sites, which had lower  
276 richness compared to either of the other two depth groups (Fig 4B). Evenness was lower for the  
277 464 – 485 m sites compared to the deeper depth groups (Fig 4C).

278 Only those environmental variables with low collinearity with other variables ( $R^2 < 0.90$ )  
279 were included in the DISTLM. Temperature had a high correlation with POC and oxygen  
280 saturation, so it was removed prior to analysis. Of the remaining 14 variables available for the  
281 DISTLM for communities within the canyon, 10 were found to be significant as indicated by the  
282 marginal tests (Table 4). AICc values computed for top models spanned a narrow range (204.09  
283 – 204.97) suggesting rather equivalent models explained the variation in community structure, as  
284 typically a difference of 2 units between models indicates separate models (Burnham &  
285 Anderson 2004, Anderson et al. 2008). The top model selected by DISTLM was a combination  
286 of oxygen saturation and fluorometry ( $R^2 = 0.2556$ ). The top models all included fluorometry,  
287 and fluorometry by itself received an AICc value only 0.8 less than the best model. The top five  
288 models contained some combination of oxygen, salinity, and/or percent organic carbon, with  
289 fluorometry. For sediment and terrain parameters, percent organic carbon and slope were the

## Macrofauna of DeSoto Canyon and adjacent slope

290 only to appear in the top models, with relatively similar fits,  $R^2 = 0.3085$  and  $0.3014$   
291 respectively.

292 The top model is plotted in the dbRDA plot (Fig 5). Deeper sites (Group III) and most of  
293 the mid-slope sites (Group II) tended to fall higher along dbRDA axis 2. The shallowest sites and  
294 S35 were differentiated along both axes. The dbRDA1 axis, explained 66.6% of the fitted  
295 variation, but 17% of the community structure variation. Fluorometry had the strongest  
296 relationship (0.864) with the first axis. The dbRDA2 axis, accounting for 33.4% of the fitted and  
297 8.5% of the overall variation, had the strongest association with oxygen saturation (0.864).

298

299 *3.3 DeSoto Canyon axis and wall vs. non-canyon slope: macrofaunal variation and abiotic*  
300 *factors*

301 Macrofaunal proportions by total individuals of major groups were reasonably  
302 comparable across habitats in the canyon and on the adjacent slope (Fig 6). Polychaetes  
303 dominated with proportions ranging from 58.41 – 64.54%, with slightly more in the canyon  
304 habitats (63 - 65%) than the slope (58%). The next most abundant groups varied depending on  
305 habitat and were generally the tanaids (8.84 – 8.72%) and bivalves (5.52 – 10.33%). Tanaids  
306 held relatively similar proportions between habitats while bivalves exhibited higher proportions  
307 on the canyon wall compared to the canyon axis and adjacent slope. Remaining groups held  
308 proportions approximately 6% or less though macrofauna in too low of abundance to form their  
309 own group, termed ‘other’, exhibited a combined proportion of 9.17% on the continental slope.

310 Global tests of abundance and diversity metrics of the three habitat types only detected  
311 differences for abundance ( $p < 0.001$ ). Abundance was highest on the canyon wall, followed by

## Macrofauna of DeSoto Canyon and adjacent slope

312 the axis, and then the slope (Fig 7A). Pairwise comparisons of the canyon axis, wall and the  
313 adjacent slope were all significantly different ( $p < 0.05$ ). No differences were found among  
314 habitats for species richness (Fig 7B) nor evenness (Fig 7C).

315 Of the 12 parameters available for comparison between habitat types, all but chlorophyll-  
316 based fluorescence, POC, and percent silt showed significant differences among the habitat  
317 types. Temperature was lower in the canyon compared to the adjacent slope (Fig 8A). Salinity  
318 was significantly higher in the canyon compared to the slope (Figure 8B). Oxygen saturation was  
319 significantly higher on the canyon wall (6.05 – 6.63 mg/l) and canyon axis (4.21 – 6.69 mg/l),  
320 compared to the slope (4.79 – 5.56 mg/l) (Fig 8C). CDOM fluorescence was higher on the  
321 canyon wall than the slope (Fig 8E). Turbidity was higher in the canyon (Fig 8F). Organic matter  
322 was significantly lower in the canyon for sediment percent carbon and percent nitrogen (Fig 8H-  
323 I). Sediment percent sand of the canyon axis was significantly higher than the slope (Fig 8J).  
324 Percent clay in the canyon wall and slope sites were higher than the canyon axis (Fig 8L).

325

### 326 *3.4 Community structure and relation to environmental variables of canyon and non-canyon* 327 *habitats*

328 A one-way ANOSIM was significant for community structure across habitats ( $p < 0.001$ ,  
329 Table 5). All pairwise comparisons of habitat types were also significant, indicating differences  
330 between all three habitats (Table 5). Community structure differences of canyon axis and wall  
331 and slope sites, depicted via NMDS in Figure 9, also portray a west-to-east longitudinal gradient  
332 moving from left to right across the ordination. Between canyon habitats, SIMPER analysis  
333 results revealed an average dissimilarity of 36.5% (Table S1). Taxa contributing the most to



## Macrofauna of DeSoto Canyon and adjacent slope

334 differences (> 2%) included clams of the family Thyasiridae, numerous deposit feeding groups  
335 spanning longosomatids, maldanids, syllids, paraonids, and cirratulid polychaetes, as well as  
336 aplacophorans. Carnivorous and omnivorous polychaetes of the Families Hesionidae and  
337 Sigalionidae were identified as well. Between slope and wall habitats, dissimilarity averaged  
338 43.4% and many of the same groups differentiated community structure but also included  
339 polynoids, fauveliopsids, and capitellids (Table S1). Taxa differentiating canyon axis and  
340 adjacent slope habitats (average dissimilarity 39.0%) were fauveliopsid, syllid, sigalionid,  
341 maldanid, and paralacydoniid polychaetes. Additionally, malletiid bivalves and various  
342 cnidarians made contributions (Table S1).

343         The environmental factors of temperature and salinity were removed from consideration  
344 prior to DISTLM to avoid model bias from high correlation with other variables, leaving 10  
345 variables available for analysis of community structure differences between habitat types. Of  
346 these all were significantly correlated with macrofauna community structure except percent sand  
347 and percent silt (Table 6). AICc values spanned a small range (180.4 – 181.41). The BEST  
348 model selected by DISTLM to explain most of the macrofaunal community variation included  
349 only 2 factors, oxygen saturation and POC flux, explaining 20.7% of macrofaunal community  
350 variation (Table 6). Water mass parameters exclusively comprised the top 9 models that  
351 explained the most community variation and most of the models contained oxygen saturation. In  
352 fact, the fifth best model included oxygen by itself with an AICc value only 0.84 higher than the  
353 top model. The 10<sup>th</sup> model was the only model to contain a sediment parameter, percent carbon,  
354 which was paired with POC flux. The first axis of the dbRDA plot of the top model (Fig 10)  
355 explained 64.2% of the fitted variation 13.3% of the total) and was strongly correlated with

## Macrofauna of DeSoto Canyon and adjacent slope

356 oxygen saturation (-0.803). The second axis accounted for 35.8% of the fitted variation and 7.4%  
357 overall and was most strongly correlated with POC flux (0.803).

358

### 359 **4. Discussion**

#### 360 *4.1 Influence of the DwH spill on the DeSoto canyon*

361 The primary goal of this study was to examine spatial variability in macrofaunal  
362 communities within the DeSoto Canyon that may have been missed at the coarse sampling scales  
363 previously undertaken. However because this study was undertaken <4 years after the Deepwater  
364 Horizon (DwH) Oil Spill, we must first consider what effect, if any, the spill had on the DeSoto  
365 Canyon fauna. Starting in April 2010, the DwH spill release 130 M gal of crude oil and natural  
366 gas from a depth of 1500 m (McNutt et al. 2012). Of the total oil, 3.0-4.9% ( $1.6$  to  $2.6 \times 10^{10}$  g)  
367 is estimated to have deposited to the deep seafloor in a 8400 km<sup>2</sup> footprint, with the highest  
368 concentration found in a 3200 km<sup>2</sup> area immediately around the wellhead (Chanton et al. 2014,  
369 Valentine et al. 2014). Small oil droplets and dissolved oil and gas formed plumes at two known  
370 depths, 50 – 500 m and 1,100 – 1500 m (Camilli et al. 2010, Socolofsky et al. 2011, Valentine et  
371 al. 2014). Where the plumes intersected the continental slope, hydrocarbons deposited.  
372 Hydrocarbons at the surface and persisting in the water column structured microbial blooms  
373 (Hazen et al. 2010, Valentine et al. 2010, Kessler et al. 2011, Redmond & Valentine 2012,  
374 Mason et al. 2014a, Kleindienst et al. 2015) whose products aggregated with unprocessed  
375 hydrocarbons, bacterial products, and phytoplankton (Passow et al. 2012, Ziervogel et al. 2012)  
376 and deposited on the seafloor (Schrope 2013, Brooks et al. 2015). The rapid plume and  
377 settlement of hydrocarbon-plankton-bacterial product aggregation deposited in an event called

## Macrofauna of DeSoto Canyon and adjacent slope

378 the marine oil-snow sedimentation and flocculent accumulation (MOSSFA) (Brooks et al. 2015,  
379 Schwing et al. 2017b).

380 Consistent with these observations, in 2011, one year following the spill, rapid soluble  
381 and insoluble hydrocarbon deposition was detected in contaminated sediment in sites located in  
382 the DeSoto Canyon, including sites PCB06, XC2, and XC3 (Brooks et al. 2015, Romero et al.  
383 2015) of the present study. Total PAH concentration of the sediment increased two to three fold  
384 (Romero et al. 2015). Sediments near the deeper plumes also experienced spikes in oil-degrading  
385 bacteria in September/October 2010 and in the summer seasons of 2012 – 2014 (Mason et al.  
386 2014b, Overholt 2018).

387 Satellite measurements indicated surface plumes triggered a phytoplankton bloom over  
388 the canyon within weeks after the wellhead was capped (Hu et al. 2011). Elevated photosynthetic  
389 microbial groups in the top 1 cm of the sediment in November and December of 2010 also  
390 confirm the influence of the phytoplankton blooms (Brooks et al. 2015). Consistent with these  
391 observations, from 2010-2013, the sediment redoxcline sustained lasting changes indicative of an  
392 influx of enriched organic matter (Hastings et al. 2015). As a result of one or both of these  
393 perturbations, benthic foraminiferans in the canyon experienced a decline in density, species  
394 richness, and bioturbation overall of the sediment ceased, initially after the spill (Brooks et al.  
395 2015, Schwing et al. 2015, Schwing et al. 2017a).

396 The distribution of highly depleted radiocarbon indicative of the DwH hydrocarbons  
397 were relatively light (Shantharam et al, in prep). Deposited hydrocarbons consisted of decayed,  
398 high molecular weight compounds *n*-alkanes (67%), low molecular weight *n*-alkanes (9%) and  
399 low weight PAHs (6%). This composition remained relatively unchanged for 3 years though  
400 large reductions in concentrations did occur for homohopanes (~67%) and low weight

## Macrofauna of DeSoto Canyon and adjacent slope

401 compounds (*n*-alkanes and PAHs, ~65% and ~66% respectively) and to a lesser degree high  
402 molecular weight *n*-alkanes (~43%) and PAHs (~12%) (Romero et al. 2020). Perturbations to  
403 phytoplankton productivity largely abated by 2014 and 2015 (Li et al. 2019) over the canyon and  
404 sedimentary bacterial communities likely returned to baseline conditions (Yang et al. 2016, Liu  
405 et al. 2017). Between 2013 – 2016, sediment bioturbation resumed (Larson et al. 2018), redox  
406 steady-state conditions returned (Hastings et al. 2020), and foraminifera density and diversity  
407 increased and stabilized (Schwing et al. 2018, Schwing & Machain-Castillo 2020). Macrofauna  
408 for PCB06, XC2, XC3, S36, and XC4, in a similar timeframe (2012 – 2014) showed no change  
409 in richness and evenness, but elevated abundance in 2012 compared to 2013 and 2014  
410 (Shantharam et al. In prep). Other macrofauna-based community stress and oil-impact indicators  
411 showed little to no signs of impact by 2014 and almost no difference from control sites by 2014  
412 (Shantharam et al., in prep). Since the influence of oil at DeSoto Canyons sites seems to have  
413 tapered off by the 2014 sampling for the current study, the assumption is therefore made that the  
414 observed patterns are representative of the “typical” environmental forcing in the DeSoto  
415 Canyon region for sediment macrofauna, although potential exceptions are noted.

416

### 417 *4.2 DeSoto Canyon macrofauna abundance, diversity, and community composition*

418 Macrofauna in the DeSoto Canyon exhibited a general decrease in abundance with depth  
419 and between depth groups (Figure 2 and 4A respectively), consistent with some of the earliest  
420 GOM studies (Rowe & Menzel 1971, Rowe et al. 1974), previous deep-sea NGOM benthic  
421 faunal surveys and studies (Blake & Doyle 1983, Pequegnat et al. 1983, Pequegnat et al. 1990,  
422 Escobar-Briones et al. 1999), other studies of GOM canyons (Escobar-Briones et al. 2008) and  
423 the general deep sea (reviewed in Etter and Rex 2010). Peak abundance occurred at the

## Macrofauna of DeSoto Canyon and adjacent slope

424 shallowest stations at 485 m. This corresponds with earlier studies of northeastern GOM that  
425 reported max density between 355 and 650 m depending on season (Pequegnat et al. 1983,  
426 Pequegnat et al. 1990) and seems common to GOM macrofauna studies (Rowe & Menzel 1971,  
427 Rowe et al. 1974, Blake & Doyle 1983, Escobar-Briones et al. 1999, Stuart et al. 2016). Several  
428 studies also noted secondary peaks at around 1100 and 1500 m, in the central and western  
429 NGOM (Pequegnat et al. 1983, Pequegnat et al. 1990, Escobar-Briones et al. 1999, Stuart et al.  
430 2016). In the current study these depths also have slightly higher values but not enough to stand  
431 out from the regression. Infaunal density in other large basins and depressions of the GOM report  
432 peak or high densities at similar depths. Baguley et al. (2006a) reported the highest density (9457  
433 ind. m<sup>-2</sup>) for central NGOM meiofauna in the Mississippi Trough at 482 m.

434         The negative parabolic relationship observed for macrofaunal species richness with depth  
435 within DeSoto Canyon, with a peak at 1100 m, is comparable to the pattern observed for general  
436 NGOM fauna (Pequegnat et al. 1990, Haedrich et al. 2008, Stuart et al. 2016, Wei & Rowe  
437 2019) and singular taxonomic groups over the larger GOM (Wicksten & Packard 2005, Reuscher  
438 & Shirley 2014, Shantharam & Baco 2019). Patterns of NGOM macrofauna richness are related  
439 to a host of environmental parameters that include food, habitat, pollution, and location  
440 (Haedrich et al. 2008), but the most influential, especially with depth, seems to be POC flux  
441 (Wei & Rowe 2019, Wei et al. accepted).

442         Evenness has not been reported in studies of NGOM macrofauna and only a few studies  
443 focused on canyons measure it. However, the classic increase of evenness with depth (Rex &  
444 Etter 2010) was observed within the Canyon and is consistent with what has been observed in the  
445 Scripps and La Jolla Canyons (~0.30 – 0.80; Vetter and Dayton 1998) , Nazaré Canyon (0.087 -  
446 0.563; Curdia et al. 2004) , the Whittard Canyon (0.662 – 0.923; Gunton 2015) and canyons of

## Macrofauna of DeSoto Canyon and adjacent slope

447 the Campos and Espirito Santo Basins off Brazil (~0.58 – 0.90, Bernardino et al. 2019). Previous  
448 studies report a large range of evenness values in canyons, indicative of an inherent disturbance  
449 regime. Macrofaunal evenness in DeSoto Canyon is somewhat narrower than what has been  
450 reported in other canyons (0.7253 – 0.919) and although the Canyon has previously been  
451 described as inactive (Uchupi & Emery 1968, Bouma 1972), the range of evenness values  
452 reported here does not preclude an inherent disturbance regime. Cross-slope and deeper currents  
453 are known to be quite strong in the NGOM (Hamilton 1992, Hamilton & Lugo-Fernandez  
454 2001) and can create a strong resonance in the narrowest part of the canyon at ~715 m (Clarke &  
455 Van Gorder 2016) which theoretically may result in a flushing-type disturbance regime within  
456 Desoto akin to steeper-sided canyons.

457

### 458 *4.3 DeSoto Canyon macrofauna composition, community structure, and association with* 459 *environmental factors*

460 Across the general NGOM Pequegnat et al (1990) first described three main depth zones  
461 for sediment macrofaunal assemblages: the Shelf/Slope-Transition (300 – 700 m), the  
462 Archibenthal Zone (700 – 1650 m), and the Abyssal (> 2000 m). Wei et al. (2010) had broader,  
463 overlapping depths with the NGOM divided into 4 zones, named the upper (213 – 542 m) with  
464 an extension submerging at 1572 m, mid and lower slope zones that split into eastern and  
465 western subzones (mid-eastern slope (625 – 1828 m), mid-western slope (863 – 1620 m), lower  
466 eastern slope (2275 – 3314 m), and lower western slope (2042 – 3008 m)), and also the abyssal  
467 plain (2954 - 3732). Within the DeSoto Canyon, macrofaunal community structure in this study  
468 showed three depth assemblages which largely fit into the regions of Pequegnat et al (1990);



## Macrofauna of DeSoto Canyon and adjacent slope

469 assemblage I at depths of 464 – 485 m, assemblage II at 669 – 1834 m, and assemblage III for  
470 sites greater than 2000 m.

471       Compositionally, the dominant macrofaunal groups maintained mostly similar proportions  
472 throughout the canyon, and the depth of peak abundances varied for all groups. Polychaetes  
473 dominated in the DeSoto Canyon, like most soft sediment continental margin environments  
474 (Gage & Tyler 1991, Grassle & Maciolek 1992), followed by crustaceans, and molluscs. While  
475 this coincides with previous NGOM surveys (Pequegnat et al. 1990), and some other Atlantic  
476 canyons (Gunton et al. 2015, Harriague et al. 2019), this pattern is not true of all canyons.  
477 Polychaetes, while the most prevalent in submarine canyons in the Hawaiian islands, are  
478 followed by molluscs and then crustaceans are the next most common (De Leo et al. 2014).  
479 Hudson Canyon off New York state, also while dominated by polychaetes, has a strong  
480 proportion of bivalves, and sipunculans. (Rowe et al. 1982). Newport Canyon off California is  
481 strongly dominated by polychaetes, nemertean, aplousobranchs, and some echinoderms  
482 (Hartman 1963, Maurer et al. 1995). Adjacent canyons can show highly heterogeneous  
483 compositions as well. Cunha et al. (2011) report the Setúbal Canyon off Portugal has abundant  
484 taxa similar in proportion to the DeSoto Canyon but nearby Nazaré Canyon is predominated by  
485 molluscs, followed by polychaetes, arthropods, and echinoderms and the Cascais Canyon  
486 maintains crustaceans as the most abundant, then polychaetes, and then molluscs. The substrate  
487 can strongly determine the most abundant group in some canyons. Polychaetes and cumaceans,  
488 for example, are the most common in muddy/silty sections of the Carson Canyon off California,  
489 sandy sections had sipunculans and isopods, and the more gravel-heavy sections exhibited  
490 majority cumaceans and echinoderms (Houston & Haedrich 1984).



## Macrofauna of DeSoto Canyon and adjacent slope

491           Within the DeSoto Canyon, some taxa, departed from the mean and had standout  
492 proportions at certain sites. Some of these disparate compositions may be attributable to  
493 hydrocarbon seep influence. Seeps occur in the canyon just as they do in with the larger GOM  
494 (MacDonald et al. 2015). Two sites sampled in the current study, Seep A and Peanut Mound, are  
495 known seeps, however since a video-guided multicorer was not employed, it could not be  
496 determined whether seep-influenced sediments were directly sampled or if general background  
497 sediments were sampled at these sites. Macrofauna in GOM seeps tends to consist of background  
498 GOM taxa and exhibit a large degree of heterogeneity in composition and community structure  
499 within seep microhabitat types (i.e., microbial mat, tubeworm, and soft sediment) (Washburn et  
500 al. 2018), typical of most seep habitats (Bernardino et al. 2012). Washburn et al. (2018)  
501 described NGOM seeps to generally be dominated by the polychaete Families Dorvilleidae,  
502 Hesionidae, and Ampharetidae, and DeSoto Canyon seeps sampled in the same study had high  
503 abundances of spionid and syllid polychaetes, and tanaid crustaceans. While none of the  
504 dominant GOM seep polychaete families were dominant in the samples of the current study,  
505 Seep A and Peanut Mound do show a high presence of syllids, spionids, and tanaids. Peanut  
506 Mound especially contained the most disparate community composition with the lowest  
507 proportion of polychaetes of the stations and the highest percentage of other crustaceans (isopods  
508 and cumaceans) and tanaids, though this did not yield a standout community structure in the  
509 NMDS. Cumaceans can especially be dominant on bacterial mats and sulfide seeps (Levin  
510 2005). Thus these results may support the sampling of seeps at Seep A and Peanut Mound,  
511 however comparison to Washburn et al. (2018) is obfuscated by the coarse taxonomic resolution  
512 of the current data, the fact that syllids and spionids are some of the most diverse polychaete

## Macrofauna of DeSoto Canyon and adjacent slope

513 groups throughout the GOM (Reuscher & Shirley 2014), and that tanaids are generally dominant  
514 throughout the canyon sites sampled in the present study.

515

### 516 *4.4 DeSoto Canyon wall vs. axis vs. the adjacent slope.*

517 The comparisons among the canyon axis, canyon wall and adjacent slope showed no  
518 difference in species richness or evenness among habitats, comparable to the findings of Wei and  
519 Rowe (2019). However, abundance was significantly higher on the canyon wall than the other  
520 habitats, and higher in the canyon axis compared to the adjacent slope. Higher abundance in the  
521 canyon is consistent with the high biomass previously observed in the canyon (Wei et al. 2012).  
522 The increased abundance on the canyon wall may be indicative of favorable environmental  
523 conditions. Parameters that were higher in at least one canyon habitat included salinity, oxygen,  
524 fluorescence, turbidity and percent sand. The parameters that showed the strongest correlation to  
525 community structure the DISTLM analyses were oxygen and POC flux. Greater oxygen in the  
526 canyon could overcome any limitation of the oxygen minimum zone observed in most mid-water  
527 regions of continental margins (Levin et al. 2001), however the lowest oxygen value of 4.22 mg/l  
528 would not be expected to be limiting to most macrofaunal species. Greater turbidity and  
529 fluorescence, potentially a product of a canyon-entrained water mass, would signify higher  
530 suspended particles in the canyon than outside and perhaps greater particulate organic matter  
531 flux to the sediments. Yet, this is contradicted by lower organic carbon and nitrogen in the  
532 canyon sediments compared to the adjacent slope. Average POC flux does show a trend of  
533 highest POC flux on the canyon wall, followed by the canyon axis, and lowest on the adjacent  
534 slope, but the differences were not statistically significant. This likely reflects the coarse

## Macrofauna of DeSoto Canyon and adjacent slope

535 resolution of the satellite measurements inadequately capturing habitat differences over a narrow  
536 geographic range but does not diminish the contribution that POC makes to community structure  
537 in general. Higher sediment organic matter has been found in the canyon before (Morse &  
538 Beazley 2008) and after (Brooks & Larson 2013, Chanton 2014) the DwH but did not appear to  
539 remain by 2014. Other unmeasured environmental variability may also influence canyon  
540 sediment macrofauna. The DeSoto Canyon contains a series of submarine channels, especially  
541 along the western wall, formed by mass movements that culminate in debris depots in the deeper  
542 basin (McAdoo et al. 2000). Sharp V-shaped incisions of these channels indicate high flushing  
543 and mass slumping until the channels reach the abyssal plain (Silva 2017). Additionally, strong  
544 currents occur along the narrow axis of the canyon (~700 m) generated by subinertial canyon  
545 resonance (Clarke & Van Gorder 2016) can reach velocities to flush sediment in the canyon (A.  
546 Clarke, pers comm), and would potentially limit accumulation of organic material along the axis,  
547 explaining the lower abundance observed. Other canyon studies have also found sediment  
548 organic matter higher on the adjacent slope rather than the canyon as a result of high sedimental  
549 flushing (Liao et al. 2017).

550

### 551 *4.5 Community structure across habitats*

552 Based on the geographic locations of the bathymetric zones within the Gulf of Mexico  
553 designated by Wei et al. (2010), all sites from the current study, including the sites S35, S36, and  
554 S42 from Wei et al. (2010) that were revisited, should fall into the eastern mid-slope zone of that  
555 study. In Wei et al (2010), this zone included the DeSoto Canyon and extended east and west of  
556 the canyon with a slender portion reaching well into the western NGOM. However, the finer

## Macrofauna of DeSoto Canyon and adjacent slope

557 scale sampling of the current study revealed differences in community structure not only of the  
558 DeSoto Canyon sites from the adjacent slope, but also disparate structure of the canyon wall  
559 compared to the canyon axis.

560 Differences were also found between the environmental parameters tied to community  
561 structure. For the zones of Wei et al (2010), cluster analysis indicated that sites in this zone were  
562 highly influenced by POC mediated by the Mississippi River, dissolved oxygen, temperature,  
563 depth, sand, relative backscatter, and percent clay. In contrast, in the finer spatial scale of the  
564 current study, many of the grain size parameters, though significant individually, fell away in the  
565 DISTLM models and more emphasis was placed on oxygen and POC flux in the water column.  
566 In the summer, the season the canyon was sampled, cyclonic and anticyclonic eddies near the  
567 DeSoto Canyon can move low salinity, biologically productive Mississippi River output across  
568 the shelf and the head of the canyon (Müller-Karger et al. 1991, Belabbassi et al. 2005, Walker  
569 et al. 2005, Biggs et al. 2008, Jochens & DiMarco 2008). Strong thermohaline stratification  
570 prevents further intrusion into deeper waters, however (Jochens & DiMarco 2008). This leaves  
571 high salinity, highly oxygenated water characteristic of the North Atlantic Deepwater (NADW)  
572 (Rivas et al. 2005, Morse & Beazley 2008) to occupy the deep (>1000 m) sites, suggesting a  
573 strong influence of in situ seawater conditions on macrobenthic communities. Community  
574 structure differences between the habitat types may be driven in part by the higher abundance  
575 observed in the canyon, likewise the canyon wall over the canyon axis. Environmental factors  
576 that contribute to the difference in abundance among the habitats may also have an influence on  
577 community composition and community structure. These were discussed in the previous section.  
578 and included higher fluorescence, turbidity, and oxygen saturation in the canyon. The greater  
579 turbidity and fluorescence (measure of water-borne chlorophyll) could support a greater

## Macrofauna of DeSoto Canyon and adjacent slope

580 proportion of suspension-feeding bivalves and polychaetes and explain the higher abundances in  
581 the canyon. The difference in community structure also tracked with an eastward trend in  
582 longitude. Biggs et al. (2008) noted sea-surface chlorophyll was higher in the northeast GOM  
583 compared to the northwest, typically reaching a peak in the June-August timeframe and  
584 structuring the slope macrobenthos across the NGOM. This seasonality may also operate in  
585 smaller scale regions such as the DeSoto Canyon. Dissolved oxygen also demonstrates a  
586 longitudinal trend with decreasing values moving west to east but does not reach limiting levels  
587 and stands in contrast to the typical increase of oxygen at this depth (Jochens et al. 2005).

588 Differing community structure is not novel when comparing macrofaunal communities in  
589 canyons against the adjacent slope (Vetter & Dayton 1998, Duineveld et al. 2001, De Leo et al.  
590 2014, Gunton et al. 2015, Bernardino et al. 2019a, Harriague et al. 2019). Disparate structures  
591 have been attributed to altered community composition that occurs because of topographical  
592 heterogeneity (De Leo et al. 2014) or higher organic loading in the canyon (Vetter & Dayton  
593 1998, Duineveld et al. 2001, Gunton et al. 2015, Harriague et al. 2019). Many of the groups  
594 contributing to differences between DeSoto Canyon and the open slope communities were  
595 indicative of organic loading, such as thyasirid bivalves and opportunistic polychaetes.  
596 Thyasirids especially are common in canyons where high organic deposition is present (Vetter &  
597 Dayton 1998, Cunha et al. 2011b, Bernardino et al. 2019a, Harriague et al. 2019) and can be the  
598 most discriminating taxon between canyon and adjacent slope habitats (Harriague et al. 2019).

599 While the difference in abundance and community structure between canyon and slope  
600 habitats is not unexpected, what drives differences within the canyon habitat communities  
601 remains elusive. Two sites which make up the canyon wall habitat, XC2 and XC3, in terms of  
602 taxonomic composition, contained proportions of molluscs higher than any of the other sites,

## Macrofauna of DeSoto Canyon and adjacent slope

603 with a high abundance of bivalves at XC3 and a high abundance of other molluscs at XC2. Noted  
604 seep-characteristic bivalve family Thyasiridae was several times more abundant at XC3 than  
605 other stations, contributing to that station's high bivalve proportions. This hints at a  
606 chemosynthetic influence such as localized hydrocarbon seepage or bacterial decomposition of  
607 some type of organic enrichment, as has been observed in other canyons (Ingels et al. 2011,  
608 Bernardino et al. 2019a, Harriague et al. 2019). However, both XC2 and XC3 were also  
609 confirmed to have received DwH-induced sediment pulses and have been shown to have had  
610 high rates of organic matter respiration in the sediment following the spill (Hastings et al. 2015).  
611 Drawdowns in sediment porewater oxygen and the toxicity of petroleum aromatic hydrocarbons  
612 were responsible for an initial benthic decline (i.e., foraminiferans) (Schwing et al. 2015). But as  
613 the sediment environment recovered, the concomitant recolonization and succession of benthic  
614 fauna, along with any organic matter respiration, could have boosted benthic populations in XC2  
615 and XC3. Thyasirids were found to be tolerant of DwH contamination (Washburn et al. 2016).  
616 The organic enrichment observed (Hastings et al. 2015, Hastings et al. 2020) at XC3 may have  
617 bolstered bacterial production and provided an ideal habitat for this chemosymbiotic bivalve to  
618 expand in numbers. Thus, the higher macrofaunal abundance on the canyon wall in 2014 may be  
619 a remnant of that effect.

620 The confounding issue with either the seep or DwH argument is that sediment organic  
621 carbon was not particularly high for XC3 (average 1.54%). Differences might then instead be  
622 attributed to even smaller scale heterogeneity within the canyon. Channels along the wall exhibit  
623 a high amount of sinuosity and sediment accumulation along sediment channel curves (Silva  
624 2017), potentially developing patches of high organic matter that could also explain the higher  
625 abundances observed. The greater sediment clay content on the canyon wall compared to the axis

## Macrofauna of DeSoto Canyon and adjacent slope

626 could reflect generally higher refractory organic matter content driving differences within the  
627 canyon. Further sampling at a higher resolution would not only better locate organically rich  
628 channel deposits but also enable identification of productive hydrocarbon seep habitats. It has  
629 been shown that there can be high turnover of canyon fauna on small spatial scales (< 100 m)  
630 (McClain & Barry 2010, Companyà-Llovet et al. 2018) that can be driven by highly sporadic  
631 food patches (Companyà-Llovet et al. 2018). The NGOM exhibits a high degree of microhabitat  
632 heterogeneity, on the order of centimeters to hundreds of kilometers, over singular isobaths  
633 (Nunnally et al. 2018) that seem to support the patch-mosaic model of Grassle and Sanders  
634 (1973). Thus, further research, at a finer sampling resolution, may be required to parse out the  
635 differences observed here.



Macrofauna of DeSoto Canyon and adjacent slope

636 **Acknowledgements**

637           The authors would like to thank the captains and crew of the RV *Weatherbird II* and  
638 fellow cruise field PIs Ian MacDonald and Joel Kostka along with the many volunteers at sea.  
639 Numerous undergraduate and graduate sorters helped process sediment samples and identify  
640 specimens including Lauren Gillies-Campbell, Ben Labelle, Melissa Olguin, Kaitlin Hurley,  
641 Christine Palmer, Savannah Goode, Rose Luzader, Meaghan Fahletti, Chrissoula Rakowski,  
642 Andrea Schmidt, Morgan Harrison, Juliana De Andrade Souza, Madison Savage, Suhavi Kaur,  
643 Reena Manohar, Ashley Christine Alvarez, Travis Ferguson, Daniel Cardenas, Julie Andrews  
644 and Jefferson Hemphill. This research was made possible by a grant from the Gulf of Mexico  
645 Research Initiative to support the Deep-C: Deep Sea to Coast Connectivity in the Eastern Gulf of  
646 Mexico Research Consortium.

647

## Macrofauna of DeSoto Canyon and adjacent slope

648

### References

- 649 Anderson M, Gorley RN, Clarke K (2008) PERMANOVA+ for primer: Guide to software and statistical  
650 methods
- 651 Anderson MJ, Walsh DC (2013) PERMANOVA, ANOSIM, and the Mantel test in the face of  
652 heterogeneous dispersions: What null hypothesis are you testing? *Ecol Monogr* 83:557-574
- 653 Antoine J, Bryant W (1968) The Major Transition Zones of the Gulf of Mexico: Desoto and Campeche  
654 Canyons. *AAPG Bull* 52:1831 - 1831
- 655 Arzola RG, Wynn RB, Lastras G, Masson DG, Weaver PP (2008) Sedimentary features and processes in  
656 the Nazaré and Setúbal submarine canyons, west Iberian margin. *Mar Geol* 250:64-88
- 657 Baguley JG, Montagna PA, Hyde LJ, Kalke RD, Rowe GT (2006a) Metazoan meiofauna abundance in  
658 relation to environmental variables in the northern Gulf of Mexico deep sea. *Deep Sea Research*  
659 *Part I: Oceanographic Research Papers* 53:1344-1362
- 660 Baguley JG, Montagna PA, Lee W, Hyde LJ, Rowe GT (2006b) Spatial and bathymetric trends in  
661 Harpacticoida (Copepoda) community structure in the Northern Gulf of Mexico deep-sea. *J Exp*  
662 *Mar Biol Ecol* 330:327-341
- 663 Balsam WL, Beeson JP (2003) Sea-floor sediment distribution in the Gulf of Mexico. *Deep Sea Research*  
664 *Part I: Oceanographic Research Papers* 50:1421-1444
- 665 Behrenfeld MJ, Falkowski PG (1997) Photosynthetic rates derived from satellite  $\square$ -based chlorophyll  
666 concentration. *Limnol Oceanogr* 42:1-20
- 667 Belabbassi L, Chapman P, Nowlin Jr WD, Jochens AE, Biggs DC (2005) Summertime nutrient supply to  
668 near-surface waters of the northeastern Gulf of Mexico: 1998, 1999, and 2000. *Gulf Mex Sci* 23:1
- 669 Bernardino AF, Gama RN, Mazzuco ACA, Omena EP, Lavrado HP (2019a) Submarine canyons support  
670 distinct macrofaunal assemblages on the deep SE Brazil margin. *Deep Sea Research Part I:*  
671 *Oceanographic Research Papers* 149:103052
- 672 Bernardino AF, Gama RN, Mazzuco ACA, Omena EP, Lavrado HP (2019b) Submarine canyons support  
673 distinct macrofaunal assemblages on the deep SE Brazil margin. *Deep Sea Research Part I:*  
674 *Oceanographic Research Papers*
- 675 Bernardino AF, Levin LA, Thurber AR, Smith CR (2012) Comparative Composition, Diversity and  
676 Trophic Ecology of Sediment Macrofauna at Vents, Seeps and Organic Falls. *PLOS ONE*  
677 7:e33515
- 678 Biggs DC, Hu C, Müller-Karger FE (2008) Remotely sensed sea-surface chlorophyll and POC flux at  
679 Deep Gulf of Mexico Benthos sampling stations. *Deep Sea Research Part II: Topical Studies in*  
680 *Oceanography* 55:2555-2562
- 681 Blake NJ, Doyle LJ (1983) Infaunal-sediment relationships at the shelf-slope break. *SEPM Special*  
682 *Publication*:381-389
- 683 Bouma AH (1972) Distribution of sediments and sedimentary structures in the Gulf of Mexico.
- 684 Brodeur RD (2001) Habitat-specific distribution of Pacific ocean perch (*Sebastes alutus*) in Pribilof  
685 Canyon, Bering Sea. *Cont Shelf Res* 21:207-224
- 686 Brooks GR, Larson RA (2013) Sediment texture and composition, NE Gulf of Mexico, 2010-2013. *Gulf*  
687 *of Mexico Research Initiative Information and Data Cooperative (GRIIDC)*, Corpus Christi, TX
- 688 Brooks GR, Larson RA, Schwing PT, Romero I, Moore C, Reichart G-J, Jilbert T, Chanton JP, Hastings  
689 DW, Overholt WA (2015) Sedimentation pulse in the NE Gulf of Mexico following the 2010  
690 DWH blowout. *PLOS ONE* 10:e0132341
- 691 Burnham KP, Anderson DR (2004) Multimodel inference: understanding AIC and BIC in model  
692 selection. *Sociol Methods Res* 33:261-304
- 693 Burrough PA, McDonnell R, McDonnell RA, Lloyd CD (2015) Principles of geographical information  
694 systems. Oxford university press

## Macrofauna of DeSoto Canyon and adjacent slope

- 695 Camilli R, Reddy CM, Yoerger DR, Van Mooy BA, Jakuba MV, Kinsey JC, McIntyre CP, Sylva SP,  
696 Maloney JV (2010) Tracking hydrocarbon plume transport and biodegradation at Deepwater  
697 Horizon. *Science* 330:201-204
- 698 Campanyà-Llovet N, Snelgrove PVR, De Leo FC (2018) Food quantity and quality in Barkley Canyon  
699 (NE Pacific) and its influence on macroinfaunal community structure. *Prog Oceanogr* 169:106-  
700 119
- 701 Canals M, Puig P, de Madron XD, Heussner S, Palanques A, Fabres J (2006) Flushing submarine  
702 canyons. *Nature* 444:354-357
- 703 Chanton J, Zhao T, Rosenheim BE, Joye SB, Bosman S, Brunner CA, Yeager KM, Diercks AR,  
704 Hollander D (2014) Using Natural Abundance Radiocarbon to trace the Flux of Petrocarbon to  
705 the Seafloor following the Deepwater Horizon Oil Spill. *Environ Sci Technol* 49:847-854
- 706 Chanton JP (2014) Radiocarbon measurements on surface sediment organic matter following the  
707 Deepwater Horizon Oil Spill, 2010-2012. Gulf of Mexico Research Initiative Information and  
708 Data Cooperative (GRIIDC), Corpus Christi, TX
- 709 Clarke AJ, Van Gorder S (2016) Subinertial canyon resonance. *Geophys Res Lett* 43:3872-3879
- 710 Clarke K, Gorley R (2015) PRIMER v7: User Manual/Tutorial; PRIMER-E: Plymouth, UK, 2015.  
711 PRIMER-E, Plymouth, UK
- 712 Coleman FC, Chanton JP, Chassignet EP (2014) Ecological Connectivity in Northeastern Gulf of Mexico  
713 – The Deep-C Initiative. *International Oil Spill Conference Proceedings 2014*:1972-1984
- 714 Company JB, Puig P, Sarda F, Palanques A, Latasa M, Scharek R (2008) Climate influence on deep sea  
715 populations. *PLOS ONE* 3:e1431
- 716 Cunha MR, Paterson GL, Amaro T, Blackbird S, de Stigter HC, Ferreira C, Glover A, Hilario A,  
717 Kiriakoulakis K, Neal L (2011a) Biodiversity of macrofaunal assemblages from three Portuguese  
718 submarine canyons (NE Atlantic). *Deep Sea Research Part II: Topical Studies in Oceanography*  
719 58:2433-2447
- 720 Cunha MR, Paterson GLJ, Amaro T, Blackbird S, de Stigter HC, Ferreira C, Glover A, Hilário A,  
721 Kiriakoulakis K, Neal L, Ravara A, Rodrigues CF, Tiago Á, Billett DSM (2011b) Biodiversity of  
722 macrofaunal assemblages from three Portuguese submarine canyons (NE Atlantic). *Deep Sea*  
723 *Research Part II: Topical Studies in Oceanography* 58:2433-2447
- 724 Curdia J, Carvalho S, Ravara A, Gage J, Rodrigues A, Quintino V (2004) Deep macrobenthic  
725 communities from Nazaré submarine canyon (NW Portugal). *Sci Mar* 68:171-180
- 726 De Leo FC, Drazen JC, Vetter EW, Rowden AA, Smith CR (2012) The effects of submarine canyons and  
727 the oxygen minimum zone on deep-sea fish assemblages off Hawai'i. *Deep Sea Research Part I:*  
728 *Oceanographic Research Papers* 64:54-70
- 729 De Leo FC, Smith CR, Rowden AA, Bowden DA, Clark MR (2010) Submarine canyons: hotspots of  
730 benthic biomass and productivity in the deep sea. *Proceedings of the Royal Society of London B:*  
731 *Biological Sciences*:rsqb20100462
- 732 De Leo FC, Vetter EW, Smith CR, Rowden AA, McGranaghan M (2014) Spatial scale-dependent habitat  
733 heterogeneity influences submarine canyon macrofaunal abundance and diversity off the Main  
734 and Northwest Hawaiian Islands. *Deep Sea Research Part II: Topical Studies in Oceanography*  
735 104:267-290
- 736 de Stigter HC, Boer W, de Jesus Mendes PA, Jesus CC, Thomsen L, van den Bergh GD, van Weering TC  
737 (2007) Recent sediment transport and deposition in the Nazaré Canyon, Portuguese continental  
738 margin. *Mar Geol* 246:144-164
- 739 Doyle LJ, Sparks TN (1980) Sediments of the Mississippi, Alabama, and Florida (MAFLA) continental  
740 shelf. *J Sediment Res* 50:905-915
- 741 Duineveld G, Lavaleye M, Berghuis E, de Wilde P (2001) Activity and composition of the benthic fauna  
742 in the Whittard Canyon and the adjacent continental slope (NE Atlantic). *Oceanol Acta* 24:69-83
- 743 Ebbe B, Billett DS, Brandt A, Ellingsen K, Glover A, Keller S, Maljutina M, Martínez Arbizu P,  
744 Molodtsova T, Rex M (2010) Diversity of abyssal marine life. *Life in the World's Oceans:*  
745 *Diversity, Distribution, and Abundance*, edited by: McIntyre, A:139-160

## Macrofauna of DeSoto Canyon and adjacent slope

- 746 Emiliani C, Gartner S, Lidz B, Eldridge K, Elvey DK, Huang TC, Stipp JJ, Swanson MF (1975)  
747 Paleoclimatological analysis of late Quaternary cores from the northeastern Gulf of Mexico.  
748 *Science* 189:1083-1088
- 749 Escobar-Briones E, Santillán ELE, Legendre P (2008) Macrofaunal density and biomass in the Campeche  
750 Canyon, Southwestern Gulf of Mexico. *Deep Sea Research Part II: Topical Studies in*  
751 *Oceanography* 55:2679-2685
- 752 Escobar-Briones E, Signoret M, Hernández D (1999) Variation of the macrobenthic infaunal density in a  
753 bathymetric gradient: Western Gulf of Mexico. *Cienc Mar* 25:193-212
- 754 Gage JD (1996) Why are there so many species in deep-sea sediments? *J Exp Mar Biol Ecol* 200:257-286
- 755 Gage JD, Tyler PA (1991) *Deep-sea biology: a natural history of organisms at the deep-sea floor.*  
756 Cambridge University Press
- 757 Garcia-Pineda O, Macdonald I, Hu C, Svejkovsky J, Hess M, Dukhovskoy D, Morey SL (2013) Detection  
758 of floating oil anomalies from the Deepwater Horizon oil spill with synthetic aperture radar.  
759 *Oceanography* 26:124-137
- 760 Genin A (2004) Bio-physical coupling in the formation of zooplankton and fish aggregations over abrupt  
761 topographies. *J Mar Syst* 50:3-20
- 762 Gerino M, Stora G, Poydenot F, Bourcier M (1995) Benthic fauna and bioturbation on the Mediterranean  
763 continental slope: Toulon Canyon. *Cont Shelf Res* 15:1483-1496
- 764 Gesteira JG, Dauvin J, Fraga MS (2003) Taxonomic level for assessing oil spill effects on soft-bottom  
765 sublittoral benthic communities. *Mar Pollut Bull* 46:562-572
- 766 Gould HR, Stewart RH (1955) Continental terrace sediments in the northeastern Gulf of Mexico. *Special*  
767 *Publications of SEPM Finding Ancient Shorelines*:2-20
- 768 Grassle JF, Maciolek NJ (1992) Deep-sea species richness: regional and local diversity estimates from  
769 quantitative bottom samples. *Am Nat*:313-341
- 770 Grassle JF, Sanders HL Life histories and the role of disturbance. *Proc Deep Sea Research and*  
771 *Oceanographic Abstracts*. Elsevier
- 772 Greene C, Wiebe P, Burczynski J, Youngbluth M (1988) Acoustical detection of high-density krill  
773 demersal layers in the submarine canyons off Georges Bank. *Science* 241:359-361
- 774 Gunton L (2015) *Deep-sea macrofaunal biodiversity of the Whittard Canyon (NE Atlantic)*. PhD,  
775 University of Southampton,
- 776 Gunton LM, Gooday AJ, Glover AG, Bett BJ (2015) Macrofaunal abundance and community  
777 composition at lower bathyal depths in different branches of the Whittard Canyon and on the  
778 adjacent slope (3500 m; NE Atlantic). *Deep Sea Research Part I: Oceanographic Research Papers*  
779 97:29-39
- 780 Haedrich RL, Devine JA, Kendall VJ (2008) Predictors of species richness in the deep-benthic fauna of  
781 the northern Gulf of Mexico. *Deep Sea Research Part II: Topical Studies in Oceanography*  
782 55:2650-2656
- 783 Hamilton P (1992) Lower continental slope cyclonic eddies in the central Gulf of Mexico. *Journal of*  
784 *Geophysical Research: Oceans* 97:2185-2200
- 785 Hamilton P, Lugo-Fernandez A (2001) Observations of high speed deep currents in the northern Gulf of  
786 Mexico. *Geophys Res Lett* 28:2867-2870
- 787 Hamilton P, Speer K, Snyder R, Wienders N, Leben RR (2015) Shelf break exchange events near the De  
788 Soto Canyon. *Cont Shelf Res* 110:25-38
- 789 Harriague AC, Danovaro R, Mistic C (2019) Macrofaunal assemblages in canyon and adjacent slope of  
790 the NW and Central Mediterranean systems. *Prog Oceanogr* 171:38-48
- 791 Harris P, Macmillan-Lawler M, Rupp J, Baker E (2014) Geomorphology of the oceans. *Mar Geol* 352:4-  
792 24
- 793 Harris PT, Whiteway T (2011) Global distribution of large submarine canyons: Geomorphic differences  
794 between active and passive continental margins. *Mar Geol* 285:69-86



## Macrofauna of DeSoto Canyon and adjacent slope

- 795 Harrold C, Light K, Lisin S (2003) Organic enrichment of submarine canyon and continental shelf  
796 benthic communities by macroalgal drift imported from nearshore kelp forests. *Limnol Oceanogr*  
797 43:669-678
- 798 Hartman O (1963) Quantitative survey of the benthos of San Pedro Basin, Southern California. Part II  
799 Biology. *Allan Hancock Pacific Expedition* 27:424
- 800 Hastings DW, Bartlett T, Brooks GR, Larson RA, Quinn KA, Razonale D, Schwing PT, Bernal LHP,  
801 Ruiz-Fernández AC, Sánchez-Cabeza J-A (2020) Changes in Redox Conditions of Surface  
802 Sediments Following the Deepwater Horizon and Ixtoc 1 Events. *Deep Oil Spills*. Springer
- 803 Hastings DW, Schwing PT, Brooks GR, Larson RA, Morford JL, Roeder T, Quinn KA, Bartlett T,  
804 Romero IC, Hollander DJ (2015) Changes in sediment redox conditions following the BP DWH  
805 blowout event. *Deep Sea Research Part II: Topical Studies in Oceanography* 129:167-198
- 806 Hazen TC, Dubinsky EA, DeSantis TZ, Andersen GL, Piceno YM, Singh N, Jansson JK, Probst A,  
807 Borglin SE, Fortney JL (2010) Deep-sea oil plume enriches indigenous oil-degrading bacteria.  
808 *Science* 330:204-208
- 809 Hickey BM (1997) The response of a steep-sided, narrow canyon to time-variable wind forcing. *J Phys*  
810 *Oceanogr* 27:697-726
- 811 Houston K, Haedrich R (1984) Abundance and biomass of macrobenthos in the vicinity of Carson  
812 Submarine Canyon, northwest Atlantic Ocean. *Mar Biol* 82:301-305
- 813 Hu C, Weisberg RH, Liu Y, Zheng L, Daly KL, English DC, Zhao J, Vargo GA (2011) Did the  
814 northeastern Gulf of Mexico become greener after the Deepwater Horizon oil spill? *Geophys Res*  
815 *Lett* 38
- 816 Hunter W, Jamieson A, Huvenne V, Witte U (2013) Sediment community responses to marine vs.  
817 terrigenous organic matter in a submarine canyon. *Biogeosciences* 10:67-80
- 818 Ingels J, Tchessunov AV, Vanreusel A (2011) Meiofauna in the Gollum Channels and the Whittard  
819 Canyon, Celtic Margin—how local environmental conditions shape nematode structure and  
820 function. *PLOS ONE* 6:e20094
- 821 Jackson MLR (1969) *Soil Chemical Analysis: Advanced Course : a Manual of Methods Useful for*  
822 *Instruction and Research in Soil Chemistry, Physical Chemistry of Soils, Soil Fertility, and Soil*  
823 *Genesis*. M.L. Jackson
- 824 Jochens AE, Bender L, DiMarco S, Morse J, Kennicutt MC, Howard M, Nowlin Jr WD (2005)  
825 *Understanding the Processes that Maintain the Oxygen Levels in the Deep Gulf of Mexico:*  
826 *Synthesis Report*. In: Interior UDOT (ed). Bureau of Ocean Energy Management
- 827 Jochens AE, DiMarco SF (2008) Physical oceanographic conditions in the deepwater Gulf of Mexico in  
828 summer 2000–2002. *Deep Sea Research Part II: Topical Studies in Oceanography* 55:2541-2554
- 829 Kessler JD, Valentine DL, Redmond MC, Du M, Chan EW, Mendes SD, Quiroz EW, Villanueva CJ,  
830 Shusta SS, Werra LM (2011) A persistent oxygen anomaly reveals the fate of spilled methane in  
831 the deep Gulf of Mexico. *Science* 331:312-315
- 832 Kleindienst S, Grim S, Sogin M, Bracco A, Crespo-Medina M, Joye SB (2015) Diverse, rare microbial  
833 taxa responded to the Deepwater Horizon deep-sea hydrocarbon plume. *ISME J*
- 834 Klinck JM (1996) Circulation near submarine canyons: A modeling study. *Journal of Geophysical*  
835 *Research: Oceans* 101:1211-1223
- 836 Konert M, Vandenberghe J (1997) Comparison of laser grain size analysis with pipette and sieve analysis:  
837 a solution for the underestimation of the clay fraction. *Sedimentology* 44:523-535
- 838 Larson RA, Brooks GR, Schwing PT, Holmes CW, Carter SR, Hollander DJ (2018) High-resolution  
839 investigation of event driven sedimentation: Northeastern Gulf of Mexico. *Anthropocene* 24:40-  
840 50
- 841 Lavoie D, Simard Y, Saucier FJ (2000) Aggregation and dispersion of krill at channel heads and shelf  
842 edges: the dynamics in the Saguenay-St. Lawrence Marine Park. *Can J Fish Aquat Sci* 57:1853-  
843 1869

## Macrofauna of DeSoto Canyon and adjacent slope

- 844 Levin L, Etter R, Rex M, Gooday A, Smith C, Pineda J, Stuart CT, Hessler R, Pawson D (2001)  
845 Environmental Influences on Regional Deep-Sea Species Diversity. *Annu Rev Ecol Syst* 32:51-  
846 93
- 847 Levin LA (2005) Ecology of cold seep sediments: Interactions of fauna with flow, chemistry and  
848 microbes. *Oceanogr Mar Biol* 43:1-46
- 849 Li Y, Hu C, Quigg A, Gao H (2019) Potential influence of the Deepwater Horizon oil spill on  
850 phytoplankton primary productivity in the northern Gulf of Mexico. *Environ Res Lett* 14:094018
- 851 Liao J-X, Chen G-M, Chiou M-D, Jan S, Wei C-L (2017) Internal tides affect benthic community  
852 structure in an energetic submarine canyon off SW Taiwan. *Deep Sea Research Part I:*  
853 *Oceanographic Research Papers* 125:147-160
- 854 Liu J, Bacosa HP, Liu Z (2017) Potential environmental factors affecting oil-degrading bacterial  
855 populations in deep and surface waters of the northern Gulf of Mexico. *Front Microbiol* 7:2131
- 856 Lutz MJ, Caldeira K, Dunbar RB, Behrenfeld MJ (2007) Seasonal rhythms of net primary production and  
857 particulate organic carbon flux to depth describe the efficiency of biological pump in the global  
858 ocean. *Journal of Geophysical Research: Oceans* (1978–2012) 112:C10011
- 859 MacDonald IR, Garcia-Pineda O, Beet A, Daneshgar Asl S, Feng L, Graettinger G, French-McCay D,  
860 Holmes J, Hu C, Huffer F, Leifer I, Muller-Karger F, Solow A, Silva M, Swayze G (2015)  
861 Natural and unnatural oil slicks in the Gulf of Mexico. *Journal of Geophysical Research: Oceans*  
862 120:8364-8380
- 863 Mason O, Han J, Woyke T, Jansson J (2014a) Single-cell genomics reveals features of a *Colwellia*  
864 species that was dominant during the Deepwater Horizon oil spill. *Front Microbiol* 5:332
- 865 Mason OU, Scott NM, Gonzalez A, Robbins-Pianka A, Bælum J, Kimbrel J, Bouskill NJ, Prestat E,  
866 Borglin S, Joyner DC, Fortney J, Jurelevicius D, Stringfellow WT, Hazen TC, Knight R, Gilbert  
867 JA, Jansson JK (2014b) Metagenomics reveals sediment microbial community response to  
868 Deepwater Horizon oil spill. *ISME J* 8:1464-1475
- 869 Maurer D, Robertson G, Gerlinger T (1995) Community Structure of Soft Bottom Macrobenthos of the  
870 Newport Submarine Canyon, California. *Marine Ecology* 16:57-72
- 871 McAdoo B, Pratson L, Orange D (2000) Submarine landslide geomorphology, US continental slope. *Mar*  
872 *Geol* 169:103-136
- 873 McClain C, R., Nunnally C, Benfield Mark C (2019) Persistent and substantial impacts of the Deepwater  
874 Horizon oil spill on deep-sea megafauna. *Royal Society Open Science* 6:191164
- 875 McClain CR, Barry JP (2010) Habitat heterogeneity, disturbance, and productivity work in concert to  
876 regulate biodiversity in deep submarine canyons. *Ecology* 91:964-976
- 877 McNutt MK, Camilli R, Crone TJ, Guthrie GD, Hsieh PA, Ryerson TB, Savas O, Shaffer F (2012)  
878 Review of flow rate estimates of the Deepwater Horizon oil spill. *Proc Natl Acad Sci USA*  
879 109:20260-20267
- 880 Morse JW, Beazley MJ (2008) Organic matter in deepwater sediments of the Northern Gulf of Mexico  
881 and its relationship to the distribution of benthic organisms. *Deep Sea Research Part II: Topical*  
882 *Studies in Oceanography* 55:2563-2571
- 883 Müller-Karger FE, Walsh JJ, Evans RH, Meyers MB (1991) On the seasonal phytoplankton  
884 concentration and sea surface temperature cycles of the Gulf of Mexico as determined by  
885 satellites. *Journal of Geophysical Research: Oceans* 96:12645-12665
- 886 Nunnally C, Landry C, Gholson S, McClain C (2018) Patchiness of sediment communities in the deep  
887 Gulf of Mexico across several spatial scales indicate a diversity of microscale habitat differences  
888 that drive diversity. *Ocean Science Meeting, Portland, OR*
- 889 Nürnberg D, Ziegler M, Karas C, Tiedemann R, Schmidt MW (2008) Interacting Loop Current variability  
890 and Mississippi River discharge over the past 400 kyr. *Earth Planet Sci Lett* 272:278-289
- 891 Oliveira A, Santos A, Rodrigues A, Vitorino J (2007) Sedimentary particle distribution and dynamics on  
892 the Nazaré canyon system and adjacent shelf (Portugal). *Mar Geol* 246:105-122
- 893 Overholt WA (2018) The response of marine benthic microbial populations to the Deepwater Horizon oil  
894 spill. Ph.D., Georgia Institute of Technology, Atlanta, GA

Macrofauna of DeSoto Canyon and adjacent slope

- 895 Passow U, Ziervogel K, Asper V, Diercks A (2012) Marine snow formation in the aftermath of the  
896 Deepwater Horizon oil spill in the Gulf of Mexico. *Environmental Research Letters* 7:035301
- 897 Paterson GL, Glover AG, Cunha MR, Neal L, de Stigter HC, Kiriakoulakis K, Billett DS, Wolff GA,  
898 Tiago A, Ravara A (2011) Disturbance, productivity and diversity in deep-sea canyons: A worm's  
899 eye view. *Deep Sea Research Part II: Topical Studies in Oceanography* 58:2448-2460
- 900 Pequegnat W, Pequegnat L, Kleypas J, James B, Kennedy E, Hubbard G (1983) The ecological  
901 communities of the continental slope and adjacent regimes of the northern Gulf of Mexico. Final  
902 report to US Dept. of the Interior, Minerals Management Service, Gulf of Mexico OCS Region,  
903 New Orleans, LA.(Contract No. AA851-CT1-12)
- 904 Pequegnat WE, Gallaway BJ, Pequegnat LH (1990) Aspects of the ecology of the deep-water fauna of the  
905 Gulf of Mexico. *Am Zool* 30:45-64
- 906 Redmond MC, Valentine DL (2012) Natural gas and temperature structured a microbial community  
907 response to the Deepwater Horizon oil spill. *Proceedings of the National Academy of Sciences*  
908 109:20292-20297
- 909 Reuscher MG, Shirley TC (2014) Diversity, distribution, and zoogeography of benthic polychaetes in the  
910 Gulf of Mexico. *Marine Biodiversity* 44:519-532
- 911 Rex MA, Etter RJ (2010) *Deep-sea biodiversity: pattern and scale*. Harvard University Press
- 912 Rinehart R, Wright DJ, Lundblad ER, Larkin EM, Murphy J, Cary-Kothera L ArcGIS 8. x benthic terrain  
913 modeler: Analysis in American Samoa. *Proc Proceedings of the 24th Annual ESRI User*  
914 *Conference, San Diego, CA*
- 915 Rivas D, Badan A, Ochoa J (2005) The Ventilation of the Deep Gulf of Mexico. *J Phys Oceanogr*  
916 35:1763-1781
- 917 Romero I, Schwing P, Brooks G, Larson R, Hastings D, Ellis G, Goddard E, Hollander D (2015)  
918 Hydrocarbons in Deep-Sea Sediments following the 2010 Deepwater Horizon Blowout in the  
919 Northeast Gulf of Mexico. *PLOS ONE* 10:e0128371-e0128371
- 920 Romero IC, Chanton JP, Roseheim BE, Radović JR, Schwing PT, Hollander DJ, Larter SR, Oldenburg  
921 TB (2020) Long-Term Preservation of Oil Spill Events in Sediments: The Case for the Deepwater  
922 Horizon Oil Spill in the Northern Gulf of Mexico. *Deep Oil Spills*. Springer
- 923 Rowe GT, Menzel DW (1971) Quantitative benthic samples from the deep Gulf of Mexico with some  
924 comments on the measurement of deep-sea biomass. *Bull Mar Sci* 21:556-566
- 925 Rowe GT, Morse J, Nunnally C, Boland GS (2008) Sediment community oxygen consumption in the  
926 deep Gulf of Mexico. *Deep Sea Research Part II: Topical Studies in Oceanography* 55:2686-2691
- 927 Rowe GT, Polloni PT, Haedrich RL (1982) The deep-sea macrobenthos on the continental margin of the  
928 northwest Atlantic Ocean. *Deep Sea Research Part A. Oceanographic Research Papers* 29:257-  
929 278
- 930 Rowe GT, Polloni PT, Horner S Benthic biomass estimates from the northwestern Atlantic Ocean and the  
931 northern Gulf of Mexico. *Proc Deep Sea Research and Oceanographic Abstracts*. Elsevier
- 932 Schlacher TA, Schlacher-Hoenlinger M, A., Williams A, Althaus F, Hooper J, Kloser R (2007) Richness  
933 and distribution of sponge megabenthos in continental margin canyons off southeastern Australia.  
934 *Mar Ecol Prog Ser* 340:73-88
- 935 Schrope M (2013) Dirty blizzard buried Deepwater Horizon oil. *Nature*
- 936 Schwing P, O'malley B, Romero I, Martínez-Colón M, Hastings D, Glabach M, Hladky E, Greco A,  
937 Hollander D (2017a) Characterizing the variability of benthic foraminifera in the northeastern  
938 Gulf of Mexico following the Deepwater Horizon event (2010–2012). *Environmental Science and*  
939 *Pollution Research* 24:2754-2769
- 940 Schwing PT, Brooks GR, Larson R, Holmes C, O'Malley B, Hollander DJ (2017b) Constraining the  
941 spatial extent of Marine Oil Snow Sedimentation and Flocculent Accumulation (MOSSFA)  
942 following the Deepwater Horizon Event using an excess <sup>210</sup>Pb flux approach. *Environ Sci*  
943 *Technol* 51:5962-5968
- 944 Schwing PT, Machain-Castillo ML (2020) Impact and Resilience of Benthic Foraminifera in the  
945 Aftermath of the Deepwater Horizon and Ixtoc 1 Oil Spills. *Deep Oil Spills*. Springer



## Macrofauna of DeSoto Canyon and adjacent slope

- 946 Schwing PT, O'Malley BJ, Hollander DJ (2018) Resilience of benthic foraminifera in the Northern Gulf  
947 of Mexico following the Deepwater Horizon event (2011–2015). *Ecol Indic* 84:753-764
- 948 Schwing PT, Romero IC, Brooks GR, Hastings DW, Larson RA, Hollander DJ (2015) A Decline in  
949 Benthic Foraminifera following the Deepwater Horizon Event in the Northeastern Gulf of  
950 Mexico. *PLOS ONE* 10:e0120565
- 951 Shantharam AK, Baco AR (2019) Biogeographic and Bathymetric Patterns of Benthic Molluscs in the  
952 Gulf of Mexico. *Deep Sea Research Part I: Oceanographic Research Papers*:103167
- 953 Shantharam AK, Wei C-L, Baco A (In prep) Interannual temporal patterns of DeSoto Canyon macrofauna  
954 and resilience to the Deepwater Horizon Oil Spill. *Mar Pollut Bull*
- 955 Silva MG (2017) Fate of the Mesophotic Coral Ecosystem (MCE) in the Northeastern Gulf of Mexico  
956 after the Deepwater Horizon Incident. Ph.D., Florida State University, Tallahassee, FL
- 957 Snelgrove PV (1999) Getting to the bottom of marine biodiversity: sedimentary habitats: ocean bottoms  
958 are the most widespread habitat on earth and support high biodiversity and key ecosystem  
959 services. *Bioscience* 49:129-138
- 960 Socolofsky SA, Adams EE, Sherwood CR (2011) Formation dynamics of subsurface hydrocarbon  
961 intrusions following the Deepwater Horizon blowout. *Geophys Res Lett* 38:L09602
- 962 Somerfield P, Clarke K (1995) Taxonomic levels, in marine community studies, revisited. *Marine  
963 ecology progress series*. Oldendorf 127:113-119
- 964 Sorbe JC (1999) Deep-sea macrofaunal assemblages within the benthic boundary layer of the Cap-Ferret  
965 Canyon (Bay of Biscay, NE Atlantic). *Deep Sea Research Part II: Topical Studies in  
966 Oceanography* 46:2309-2329
- 967 Stuart CT, Brault S, Rowe GT, Wei CL, Wagstaff M, McClain CR, Rex MA (2016) Nestedness and  
968 species replacement along bathymetric gradients in the deep sea reflect productivity: a test with  
969 polychaete assemblages in the oligotrophic north-west Gulf of Mexico. *J Biogeogr* 44:548-555
- 970 Team RC (2019) R: A language and environment for statistical computing. R Foundation for Statistical  
971 Computing, Vienna, Austria
- 972 Tyler P, Amaro T, Arzola R, Cunha MR, De Stigter H, Gooday A, Huvenne V, Ingels J, Kiriakoulakis K,  
973 Lastras G, Masson D, Oliveira A, Pattenden A, Vanreusel ANN, Van Weering T, Vitorino J,  
974 Witte U, Wolff G (2009) Europe's Grand Canyon Nazare Submarine Canyon. *Oceanography*  
975 22:46-57
- 976 Uchupi E, Emery KO (1968) Structure of continental margin off Gulf Coast of United States. *AAPG Bull*  
977 52:1162-1193
- 978 Uiblein F, Lorance P, Latrouite D (2003) Behaviour and habitat utilisation of seven demersal fish species  
979 on the Bay of Biscay continental slope, NE Atlantic. *Mar Ecol Prog Ser* 257:223-232
- 980 Valentine DL, Fisher GB, Bagby SC, Nelson RK, Reddy CM, Sylva SP, Woo MA (2014) Fallout plume  
981 of submerged oil from Deepwater Horizon. *Proc Natl Acad Sci USA* 111:15906-15911
- 982 Valentine DL, Kessler JD, Redmond MC, Mendes SD, Heintz MB, Farwell C, Hu L, Kinnaman FS,  
983 Yvon-Lewis S, Du M (2010) Propane respiration jump-starts microbial response to a deep oil  
984 spill. *Science* 330:208-211
- 985 Vetter E, Dayton P (1998) Macrofaunal communities within and adjacent to a detritus-rich submarine  
986 canyon system. *Deep Sea Research Part II: Topical Studies in Oceanography* 45:25-54
- 987 Vetter E, Dayton P (1999) Organic enrichment by macrophyte detritus, and abundance patterns of  
988 megafaunal populations in submarine canyons. *Marine ecology. Progress series* 186:137-148
- 989 Vetter EW (1994) Hotspots of benthic production. *Nature* 372:47
- 990 Vetter EW, Smith CR, De Leo FC (2010) Hawaiian hotspots: enhanced megafaunal abundance and  
991 diversity in submarine canyons on the oceanic islands of Hawaii. *Marine Ecology* 31:183-199
- 992 Walker ND, Wiseman Jr WJ, Rouse Jr LJ, Babin A (2005) Effects of river discharge, wind stress, and  
993 slope eddies on circulation and the satellite-observed structure of the Mississippi River plume. *J  
994 Coast Res*:1228-1244
- 995 Warwick R (1988) Analysis of community attributes of the macrobenthos of Frierfjord/Langesundfjord at  
996 taxonomic levels higher than species. *Mar Ecol Prog Ser* 46:167-170

## Macrofauna of DeSoto Canyon and adjacent slope

- 997 Washburn T, Rhodes AC, Montagna PA (2016) Benthic taxa as potential indicators of a deep-sea oil spill.  
998 *Ecol Indic* 71:587-597
- 999 Washburn TW, Demopoulos AWJ, Montagna PA (2018) Macrobenthic infaunal communities associated  
1000 with deep-sea hydrocarbon seeps in the northern Gulf of Mexico. *Marine Ecology* 39:e12508
- 1001 Wei C-L, Chen M, Wicksten MK, Rowe Gilbert T (accepted) Macrofauna bivalve diversity from the deep  
1002 northern Gulf of Mexico. *Ecol Res*
- 1003 Wei C-L, Rowe GT (2019) Productivity controls macrofauna diversity in the deep northern Gulf of  
1004 Mexico. *Deep Sea Research Part I: Oceanographic Research Papers* 143:17-27
- 1005 Wei C-L, Rowe GT, Escobar-Briones E, Nunnally C, Soliman Y, Ellis N (2012) Standing Stocks and  
1006 Body Size of Deep-sea Macrofauna: Predicting the Baseline of 2010 *Deepwater Horizon* Oil  
1007 Spill in the Northern Gulf of Mexico. *Deep Sea Research Part I: Oceanographic Research Papers*
- 1008 Wei C-L, Rowe GT, Hubbard GF, Scheltema AH, Wilson GD, Petrescu I, Foster JM, Wicksten MK,  
1009 Chen M, Davenport R, Soliman YS, Wang Y (2010) Bathymetric zonation of deep-sea  
1010 macrofauna in relation to export of surface phytoplankton production. *Mar Ecol Prog Ser* 399:1-  
1011 14
- 1012 Wicksten MK, Packard JM (2005) A qualitative zoogeographic analysis of decapod crustaceans of the  
1013 continental slopes and abyssal plain of the Gulf of Mexico. *Deep Sea Research Part I:*  
1014 *Oceanographic Research Papers* 52:1745-1765
- 1015 Yang T, Nigro LM, Gutierrez T, Joye SB, Highsmith R, Teske A (2016) Pulsed blooms and persistent oil-  
1016 degrading bacterial populations in the water column during and after the Deepwater Horizon  
1017 blowout. *Deep Sea Research Part II: Topical Studies in Oceanography* 129:282-291
- 1018 Yeager KM, Santschi PH, Rowe GT (2004) Sediment accumulation and radionuclide inventories <sup>239,240</sup>Pu,  
1019 <sup>210</sup>Pb and <sup>234</sup>Th in the northern Gulf of Mexico, as influenced by organic matter and macrofaunal  
1020 density. *Mar Chem* 91:1-14
- 1021 Yoklavich MM, Greene HG, Cailliet GM, Sullivan DE, Lea RN, Love MS (2000) Habitat associations of  
1022 deep-water rockfishes in a submarine canyon: an example of a natural refuge. *Fishery Bulletin-*  
1023 *National Oceanic and Atmospheric Administration* 98:625-641
- 1024 Ziervogel K, McKay L, Rhodes B, Osburn CL, Dickson-Brown J, Arnosti C, Teske A (2012) Microbial  
1025 activities and dissolved organic matter dynamics in oil-contaminated surface seawater from the  
1026 Deepwater Horizon oil spill site. *PLOS ONE* 7:e34816

1027

1028

## Macrofauna of DeSoto Canyon and adjacent slope

1029 Table 1. Station list with summary data for multicore deployments on the *R/V Weatherbird II*, in the  
1030 DeSoto Canyon and adjacent slope in 2014. Three replicate deployments of the multicore were made at  
1031 each station.

1032

1033

1034

1035

1036

1037

1038

1039

1040

1041

1042

1043

1044

1045

1046

1047

1048

1049

1050

1051

1052

1053

1054

1055

| Station           | Lat (N) | Long (W) | Date (dd-mm-2014) | Depth (m) | Treatment |
|-------------------|---------|----------|-------------------|-----------|-----------|
| S35               | 29.3337 | -87.0502 | 1-Jun             | 669       | Axis      |
| PCB06             | 29.1950 | -87.4383 | 2-Jun             | 1167      | Axis      |
| S36               | 28.9163 | -87.6692 | 3-Jun             | 1834      | Axis      |
| Seep A            | 29.0430 | -87.2825 | 7-Jun             | 1114      | Axis      |
| AC1               | 29.4745 | -86.9587 | 4-Jun             | 464       | Axis      |
| XC1               | 29.2482 | -87.7318 | 2-Jun             | 485       | Wall      |
| XC2               | 29.1210 | -87.8655 | 3-Jun             | 1137      | Wall      |
| XC3               | 28.9762 | -87.8683 | 4-Jun             | 1510      | Wall      |
| Peanut Mound (PM) | 28.5497 | -88.0862 | 9-Jun             | 2045      | Wall      |
| XC4               | 28.6365 | -87.8685 | 9-Jun             | 2290      | Wall      |
| NT800             | 28.0560 | -85.9335 | 30-May            | 808       | Slope     |
| NT1000            | 28.0040 | -85.9990 | 31-May            | 978       | Slope     |
| S42               | 28.2528 | -86.4217 | 31-May            | 771       | Slope     |

Macrofauna of DeSoto Canyon and adjacent slope

1056 Table 2. Summary of environmental factors sampled in the DeSoto Canyon with ranges of values for each parameter across all samples.

| Variable type        | Name                         | Source          | Sample Availability |       | Range         | Unit                     |
|----------------------|------------------------------|-----------------|---------------------|-------|---------------|--------------------------|
|                      |                              |                 | Canyon              | Slope |               |                          |
| Seafloor/Terrain     | Slope                        | Bathymetry      | X                   |       | 0.16 – 4.33   | degrees                  |
|                      | Aspect - northness           | Bathymetry      | X                   |       | -1.0 – 1.0    | degrees                  |
|                      | Aspect-eastness              | Bathymetry      | X                   |       | -1.0 – 1.0    | degrees                  |
| Sediment environment | %carbon                      | Core sub-sample | X                   | X     | 1.30 – 2.67   | %                        |
|                      | %nitrogen                    | Core sub-sample | X                   | X     | 0.12 – 0.36   | %                        |
|                      | %sand                        | Core sub-sample | X                   | X     | 14.81 – 65.04 | %                        |
|                      | %silt                        | Core sub-sample | X                   | X     | 30.43 – 74.93 | %                        |
|                      | %clay                        | Core sub-sample | X                   | X     | 0.14 – 29.50  | %                        |
| Water mass           | Salinity                     | CTD rosette     | X                   | X     | 34.89 – 35.27 | PSU                      |
|                      | Temperature                  | CTD rosette     | X                   | X     | 4.27 – 10.61  | deg C                    |
|                      | O <sub>2</sub> sat           | CTD rosette     | X                   | X     | 3.81 – 6.72   | mg/l                     |
|                      | Fluorometry Eco-Afl and CDOM | CTD rosette     | X                   | X     | 2.95 – 9.04   | mg/m <sup>3</sup>        |
|                      | Turbidity                    | CTD rosette     | X                   | X     | 0.18 – 8.08   | NTU                      |
|                      | Particulate Organic Carbon   | Remote sensing  | X                   | X     | 7.90 – 34.35  | mg C/m <sup>2</sup> /day |

1057

Macrofauna of DeSoto Canyon and adjacent slope

1058

1059 Table 3. Major taxonomic group proportions for Desoto Canyon macrofauna by station.

| Station      | Depth (m) | Bivalvia | Other Mollusca | Nemertea | Polychaeta | Amphipoda | Tanaidacea | Other Crustacea | Miscellaneous |
|--------------|-----------|----------|----------------|----------|------------|-----------|------------|-----------------|---------------|
| XC1          | 485       | 2.84     | 8.53           | 5.80     | 77.84      | 2.50      | 2.27       | 0.23            | 3.3           |
| AC1          | 464       | 3.99     | 2.37           | 4.73     | 74.74      | 1.77      | 3.69       | 4.28            | 5.32          |
| S35          | 669       | 3.92     | 8.55           | 2.32     | 63.64      | 2.32      | 12.12      | 7.84            | 3.21          |
| SEEP A       | 1114      | 3.88     | 3.40           | 4.61     | 69.17      | 3.88      | 7.04       | 4.85            | 3.89          |
| PCB06        | 1167      | 8.88     | 9.06           | 4.83     | 59.85      | 3.28      | 7.53       | 4.05            | 5.99          |
| XC2          | 1137      | 7.60     | 16.99          | 3.73     | 63.81      | 3.87      | 5.66       | 2.62            | 4.01          |
| XC3          | 1510      | 13.53    | 4.51           | 4.51     | 65.38      | 0.32      | 8.21       | 2.09            | 2.74          |
| S36          | 1834      | 6.94     | 3.85           | 4.11     | 59.64      | 4.88      | 7.20       | 9.51            | 4.37          |
| Peanut Mound | 2045      | 4.88     | 3.04           | 3.96     | 49.09      | 3.05      | 16.46      | 17.99           | 2.44          |
| XC4          | 2290      | 6.37     | 2.45           | 4.41     | 65.20      | 1.47      | 6.86       | 11.76           | 2.45          |

1060

Macrofauna of DeSoto Canyon and adjacent slope

1061 Table 4. DISTLM marginal tests and overall best solutions for the environmental factors compared to  
 1062 macrofaunal assemblage structure within the DeSoto Canyon.

| Variable No.           | Variable                                 | SS(trace) | Pseudo-F      | P            | Prop.    |
|------------------------|------------------------------------------|-----------|---------------|--------------|----------|
| 1                      | Salinity                                 | 3227.2    | 3.5318        | <b>0.002</b> | 0.11201  |
| 2                      | O <sub>2</sub> saturation [mg/l]         | 4141.9    | 4.701         | <b>0.001</b> | 0.14376  |
| 3                      | Fluorometry Eco-afl<br>mg/m <sup>3</sup> | 4887.9    | 5.7207        | <b>0.001</b> | 0.16965  |
| 4                      | Fluorometry CDOM<br>mg/m <sup>3</sup>    | 1590.3    | 1.6358        | 0.069        | 0.055197 |
| 5                      | POC                                      | 4593.4    | 5.3106        | <b>0.001</b> | 0.15943  |
| 6                      | Turbidity                                | 2916.2    | 3.1531        | <b>0.002</b> | 0.10121  |
| 7                      | %carbon                                  | 4295.8    | 4.9062        | <b>0.001</b> | 0.1491   |
| 8                      | %nitrogen                                | 3175.6    | 3.4684        | <b>0.001</b> | 0.11022  |
| 9                      | %sand                                    | 2152.3    | 2.2606        | <b>0.009</b> | 0.074703 |
| 10                     | %silt                                    | 1698.3    | 1.7538        | <b>0.044</b> | 0.058944 |
| 11                     | %clay                                    | 1226.8    | 1.2452        | 0.17         | 0.042578 |
| 12                     | Aspect-northness                         | 800.71    | 0.80038       | 0.691        | 0.027791 |
| 13                     | Aspect-eastness                          | 1400.6    | 1.4306        | 0.118        | 0.048611 |
| 14                     | Slope                                    | 2707      | 2.9035        | <b>0.001</b> | 0.093954 |
| Overall Best Solutions |                                          |           |               |              |          |
| AICc                   | R <sup>2</sup>                           | RSS       | No. Variables | Selections   |          |
| 204.09                 | 0.25555                                  | 21449     | 2             | 2,3          |          |
| 204.25                 | 0.31549                                  | 19722     | 3             | 1-3          |          |
| 204.4                  | 0.24777                                  | 21673     | 2             | 1,3          |          |
| 204.55                 | 0.3085                                   | 19923     | 3             | 2,3,7        |          |
| 204.62                 | 0.24227                                  | 21832     | 2             | 3,7          |          |
| 204.71                 | 0.30498                                  | 20025     | 3             | 2-4          |          |
| 204.86                 | 0.30142                                  | 20127     | 3             | 2,3,14       |          |
| 204.89                 | 0.16965                                  | 23924     | 1             | 3            |          |
| 204.91                 | 0.30025                                  | 20161     | 3             | 2,3,5        |          |
| 204.97                 | 0.23345                                  | 22086     | 2             | 3,5          |          |

1063

1064

## Macrofauna of DeSoto Canyon and adjacent slope

1065 Table 5. One-way ANOSIM with pairwise comparisons of community structure among and between  
1066 habitat types in the canyon (wall and axis, 669 – 1834 m) and adjacent slope (771 – 978 m). Bolded  
1067 values indicate significant differences between groups ( $p < 0.05$ ).

| Canyon Wall vs. Axis vs. Slope | R <sup>2</sup> | p-value      | Permutations |
|--------------------------------|----------------|--------------|--------------|
| Global test                    | 0.483          | <b>0.001</b> | 999          |
| Pairwise groups                |                |              |              |
| Slope, Axis                    | 0.485          | <b>0.004</b> | 462          |
| Slope, Wall                    | 0.757          | <b>0.002</b> | 462          |
| Axis, Wall                     | 0.291          | <b>0.030</b> | 462          |

1068



Macrofauna of DeSoto Canyon and adjacent slope

1069 Table 6. DISTLM marginal tests and overall best solutions for the environmental factors compared to  
 1070 macrofaunal assemblage structure among the axis and wall canyon macrofauna communities at depths of  
 1071 669 – 1834 m compared to the adjacent non-canyon slope at 771 – 978 m depth.

| Variable No.           | Variable Name                         | SS(trace) | Pseudo-F     | p-value      | Prop     |
|------------------------|---------------------------------------|-----------|--------------|--------------|----------|
| 1                      | O <sub>2</sub> saturation [mg/l]      | 2115.5    | 2.1826       | <b>0.001</b> | 0.10113  |
| 2                      | Fluorometry Eco-afl mg/m <sup>3</sup> | 1602.7    | 2.0744       | <b>0.007</b> | 0.076617 |
| 3                      | Fluorometry CDOM mg/m <sup>3</sup>    | 1534.5    | 1.979        | <b>0.006</b> | 0.073354 |
| 4                      | POC                                   | 1782.5    | 2.3292       | <b>0.001</b> | 0.085226 |
| 5                      | Turbidity                             | 1927.1    | 2.5367       | <b>0.001</b> | 0.092122 |
| 6                      | %carbon                               | 1927.8    | 2.5379       | <b>0.001</b> | 0.092159 |
| 7                      | %nitrogen                             | 1487.3    | 1.9136       | <b>0.015</b> | 0.071102 |
| 8                      | %sand                                 | 666.78    | 0.82311      | 0.696        | 0.031875 |
| 9                      | %silt                                 | 910.78    | 1.138        | 0.3          | 0.043539 |
| 10                     | %clay                                 | 1418.3    | 1.8183       | <b>0.017</b> | 0.0678   |
| Overall Best Solutions |                                       |           |              |              |          |
| AICc                   | R <sup>2</sup>                        | RSS       | No.Variables | Selections   |          |
| 180.4                  | 0.20708                               | 16587     | 2            | 1,4          |          |
| 180.73                 | 0.27562                               | 15153     | 3            | 1,3,4        |          |
| 180.77                 | 0.19618                               | 16815     | 2            | 1,5          |          |
| 181.11                 | 0.26526                               | 15370     | 3            | 1,4,5        |          |
| 181.24                 | 0.10113                               | 18803     | 1            | 1            |          |
| 181.26                 | 0.1814                                | 17124     | 2            | 3,4          |          |
| 181.26                 | 0.2612                                | 15455     | 3            | 1,2,4        |          |
| 181.27                 | 0.18095                               | 17133     | 2            | 1,2          |          |
| 181.31                 | 0.25991                               | 15482     | 3            | 1,3,5        |          |
| 181.41                 | 0.17683                               | 17219     | 2            | 4,6          |          |

1072

## Macrofauna of DeSoto Canyon and adjacent slope

1073 Figure 1. Bathymetric map of DeSoto Canyon sites sampled in 2014 relative to the position of the DwH  
1074 wellhead. Ten sites traverse along the axis of the canyon (black triangles) and along the canyon wall  
1075 (open triangles) and three are located on the adjacent slope (circles). Contour line depths are in meters.

1076

1077

1078

1079

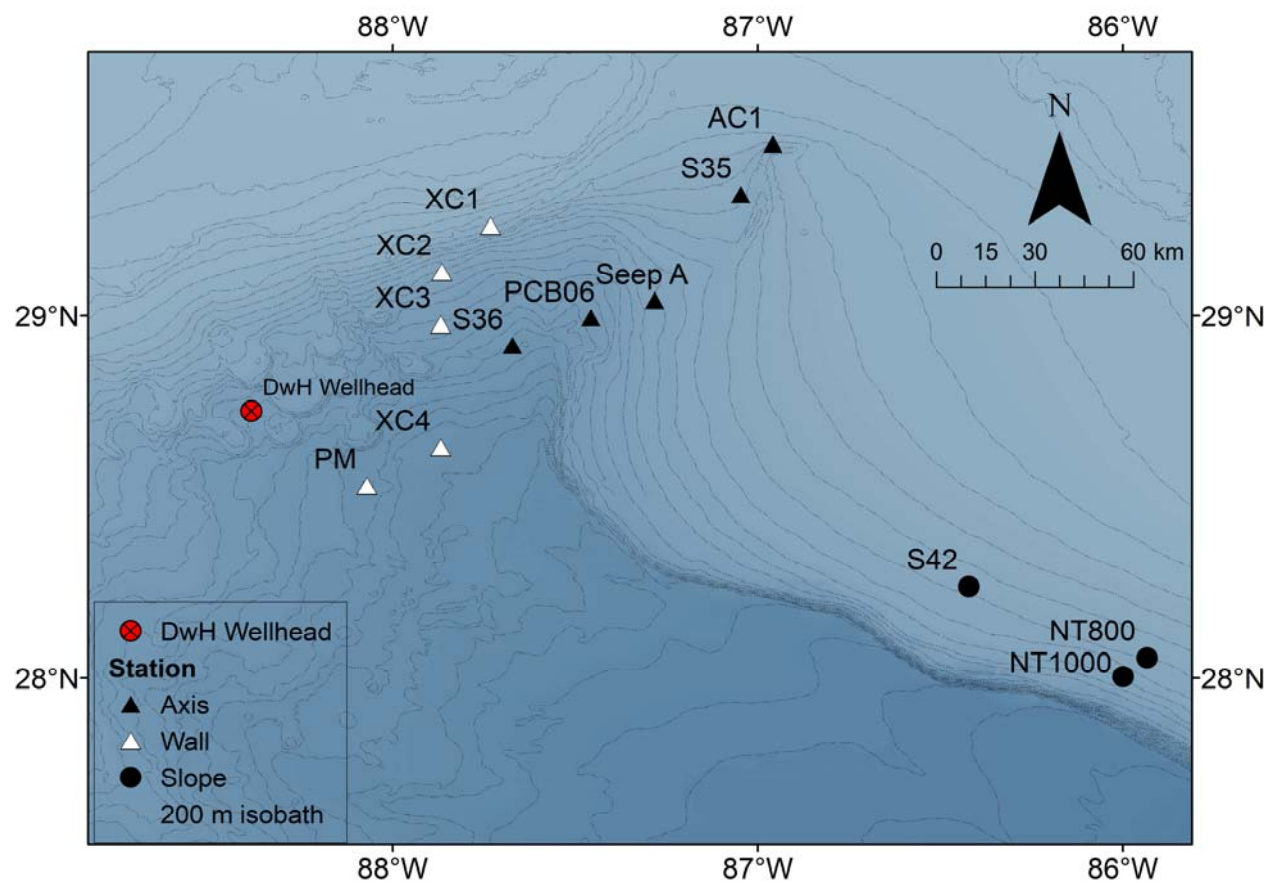

PK

## Macrofauna of DeSoto Canyon and adjacent slope

1080 Figure 2. Mean abundance and diversity metrics within the DeSoto Canyon ordered by depth. A)  
1081 Abundance ( $F_{(1, 8)} = 16.75$ ). B) Species richness ( $F_{(2, 7)} = 25.56$ ). C) Pielou's evenness ( $F_{(1, 8)} = 5.686$ ).  
1082 Error bars are standard error of the mean.

1083

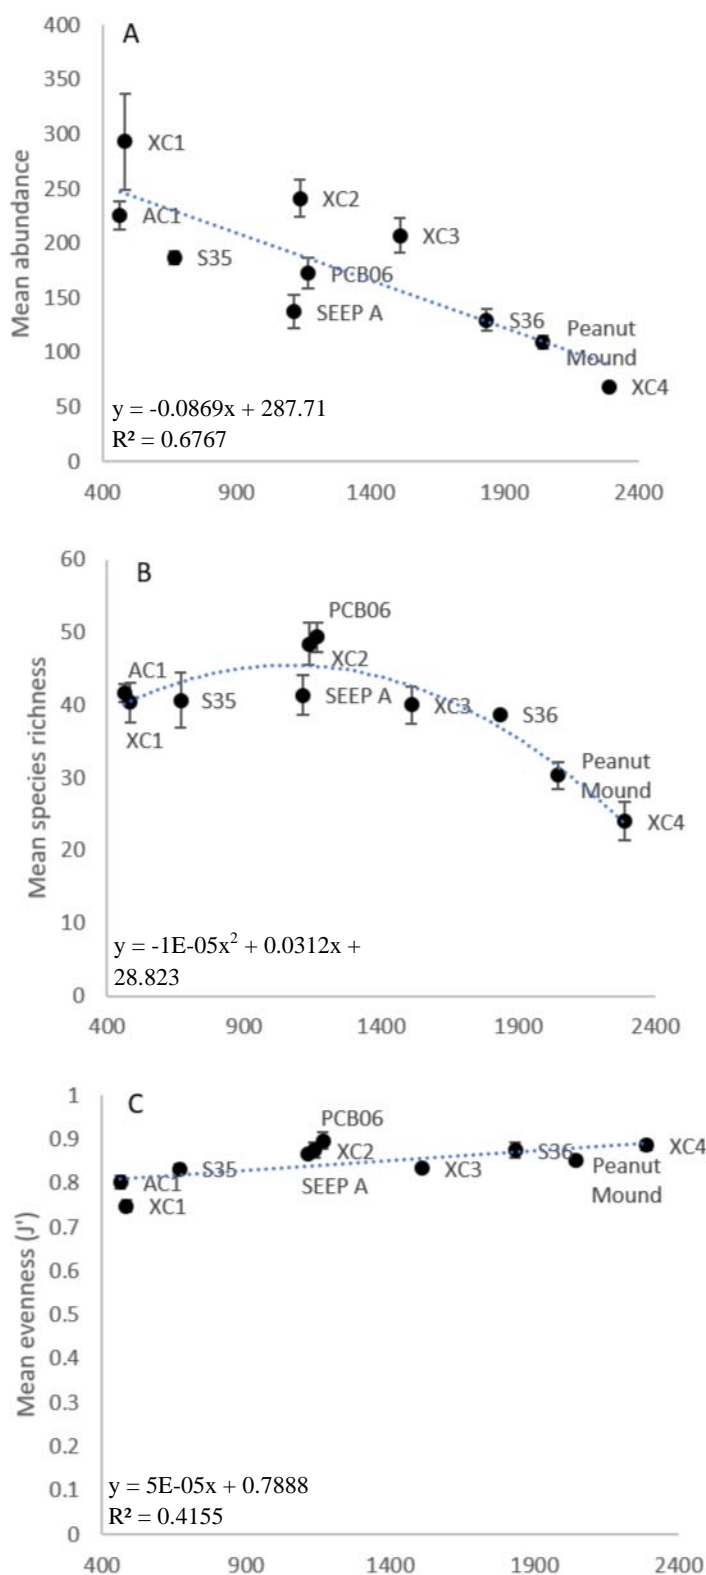

Macrofauna of DeSoto Canyon and adjacent slope

1084

1085 Figure 3. A) Cluster analysis based on root-transformed abundances of DeSoto Canyon macrofauna. The  
 1086 black dots indicate nodes of significant clusters (Pairwise ANOSIM  $R = 0.526 - 0.904$ ,  $p \leq 0.001 -$   
 1087  $0.002$ ). B) Non-metric multidimensional scaling of DeSoto Canyon macrofauna.

1088

1089

1090

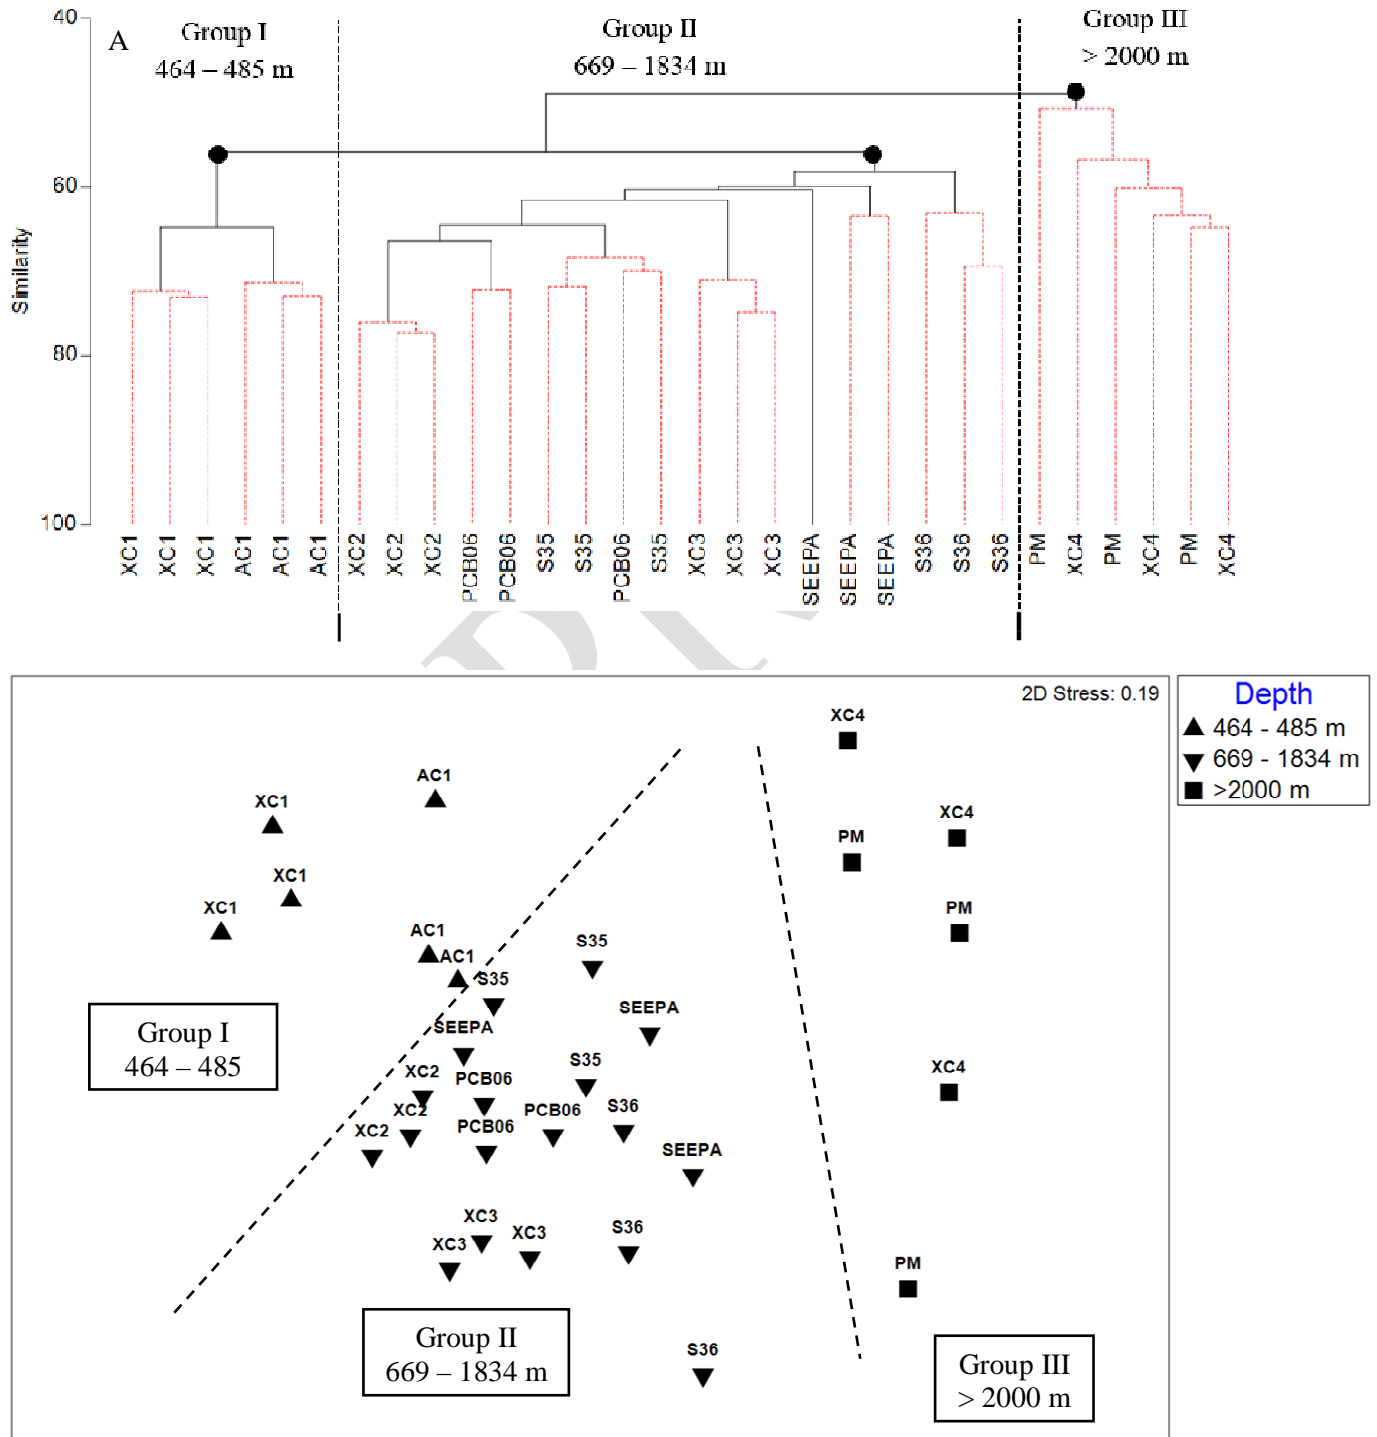

## Macrofauna of DeSoto Canyon and adjacent slope

1091 Figure 4. Diversity metric comparisons among *a posteriori* depth groups for DeSoto Canyon macrofauna  
1092 (A) abundance ( $\chi^2 = 19.148$ ;  $p < 0.001$ ), (B) species richness ( $\chi^2 = 14.28$ ;  $p < 0.001$ ), and (C) Pielou's  
1093 evenness ( $\chi^2 = 13.278$ ;  $p = 0.0013$ ). Shared letter indicates no statistical difference between depth groups  
1094 ( $p > 0.05$ ).

1095

1096

1097

1098

1099

1100

1101

1102

1103

1104

1105

1106

1107

1108

1109

1110

1111

1112

1113

1114

1115

1116

1117

1118

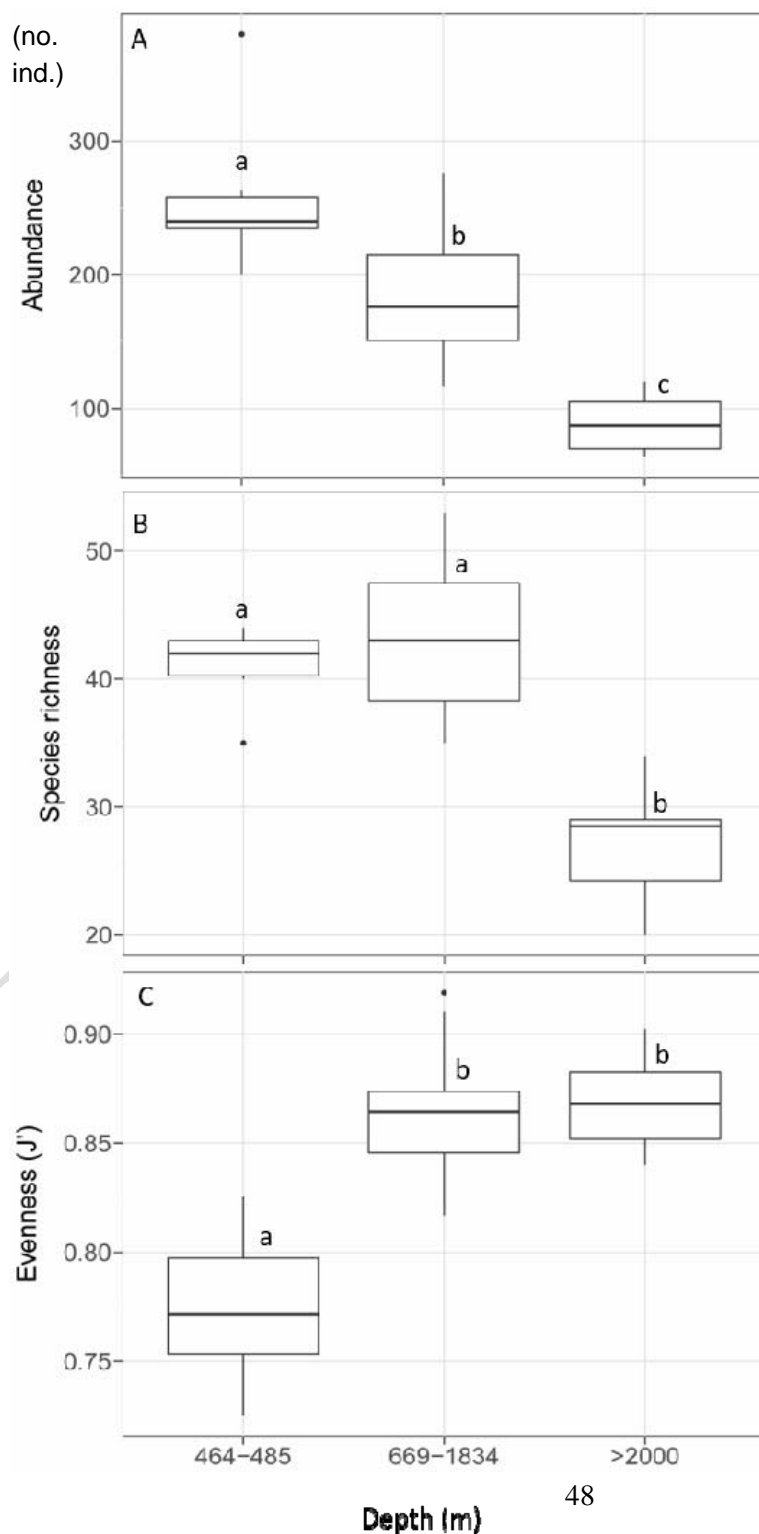

## Macrofauna of DeSoto Canyon and adjacent slope

1119 Figure 5. Distance-based redundancy analysis (dbRDA) plot of the top DISTLM model of community  
1120 structure and environmental variables within DeSoto Canyon.

1121

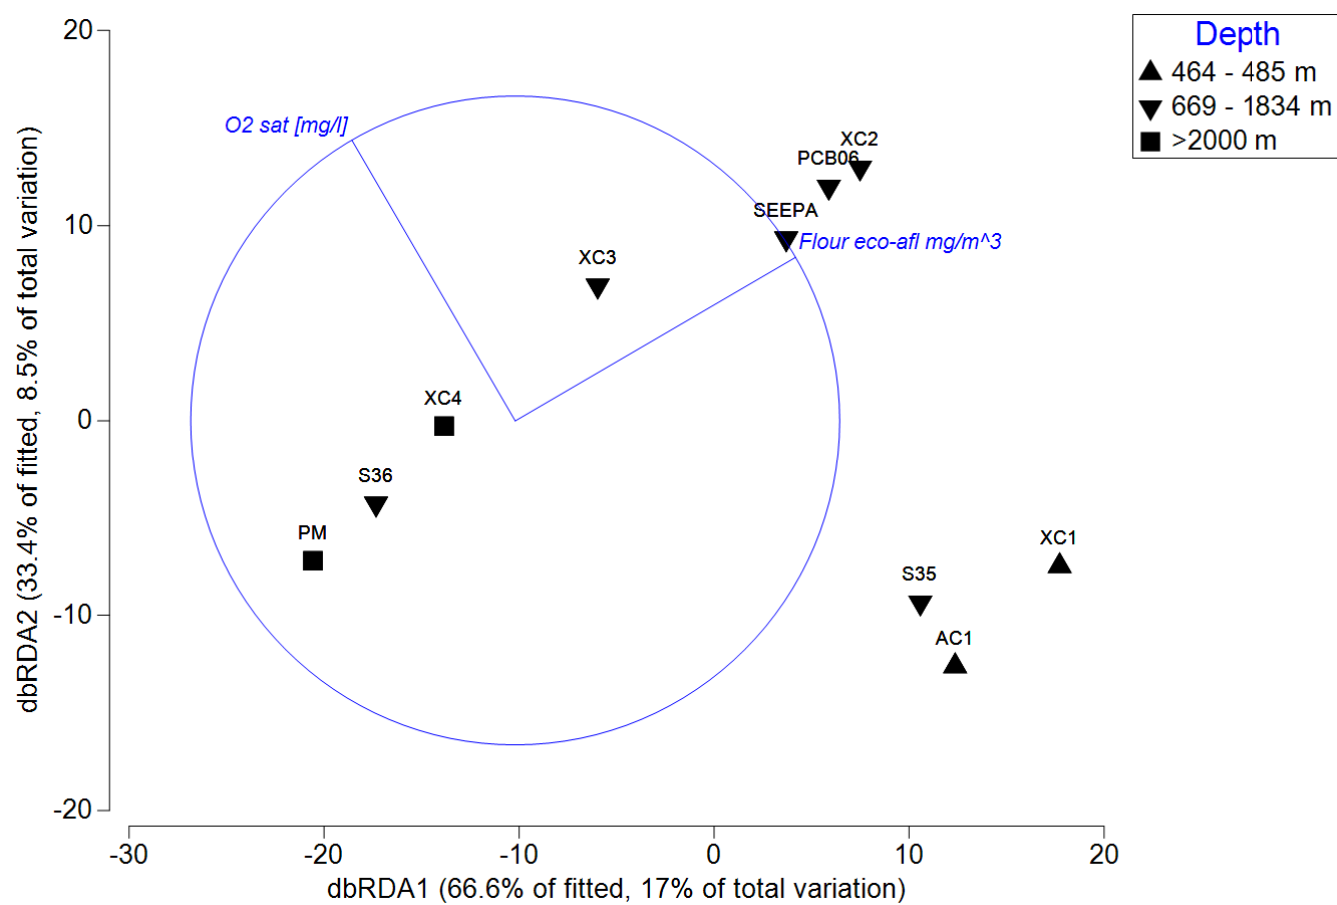

### Macrofauna of DeSoto Canyon and adjacent slope

1122 Figure 6. Relative abundance of major taxonomic groups by overall totals in the DeSoto Canyon habitats  
1123 (wall, axis) compared to the adjacent continental slope.

1124

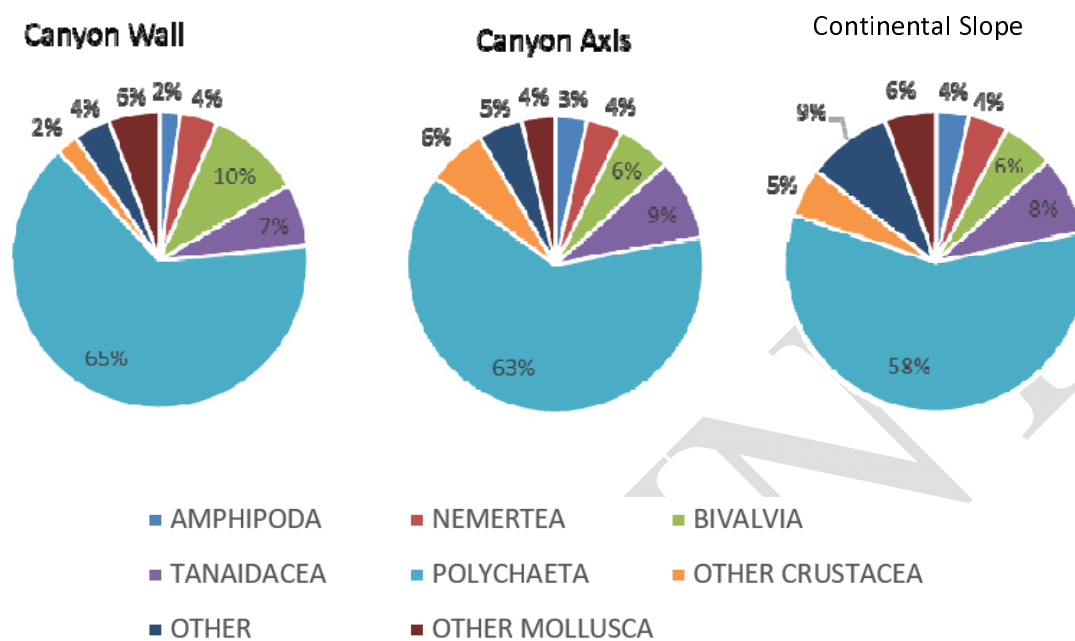



## Macrofauna of DeSoto Canyon and adjacent slope

1125 Figure 7. Diversity metrics comparing canyon habitat Group II axis and wall sites (669 – 1510 m) and  
1126 adjacent slope (771 – 978 m). A) Abundance ( $\chi^2 = 15.72$ ;  $p < 0.001$ ). B) Species richness ( $\chi^2 = 1.3324$ ;  $p$   
1127 = 0.5137). C) Pielou's evenness ( $\chi^2 = 1.4951$ ;  $p = 0.4735$ ). Shared letter indicates no statistical difference  
1128 between depth groups ( $p > 0.05$ ).

1129

1130

1131

1132

1133

1134

1135

1136

1137

1138

1139

1140

1141

1142

1143

1144

1145

1146

1147

1148

1149

1150

1151

1152

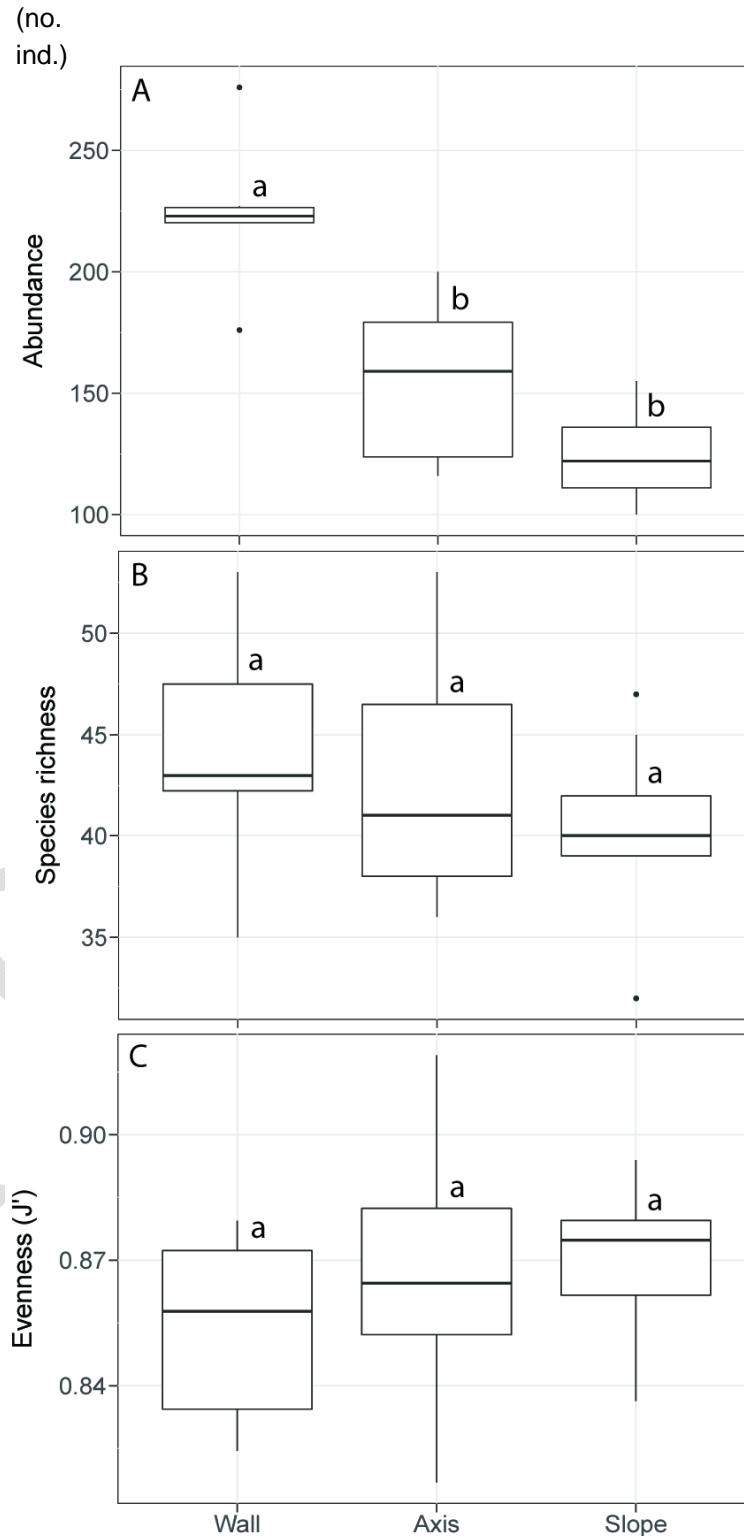

## Macrofauna of DeSoto Canyon and adjacent slope

1153 Figure 8. Boxplots of environmental factors across habitat types (canyon wall, axis and adjacent slope).  
 1154 Shared letter indicates no statistical difference between depth groups ( $p > 0.05$ ). A) Temperature ( $\chi^2 =$   
 1155  $8.125$ ,  $p = 0.01721$ ). B) Salinity ( $\chi^2 = 13.903$ ,  $p < 0.001$ ). C) Oxygen saturation ( $\chi^2 = 8.125$ ,  $p = 0.01721$ ).  
 1156 D) Fluorometry Eco-Afl ( $\chi^2 = 1.95$ ,  $p = 0.3772$ ). E) Fluorometry CDOM ( $\chi^2 = 7.1861$ ,  $p = 0.02751$ ). F)  
 1157 Turbidity ( $\chi^2 = 10.761$ ,  $p = 0.004605$ ). G) POC flux ( $\chi^2 = 5.7778$ ,  $p = 0.05564$ ). H) Organic carbon ( $\chi^2 =$   
 1158  $12.568$ ,  $p = 0.001866$ ). I) Organic nitrogen ( $\chi^2 = 8.3891$ ,  $p = 0.01508$ ). J) % sand ( $\chi^2 = 6.9524$ ,  $p =$   
 1159  $0.03092$ ). K) % silt ( $\chi^2 = 2.7557$ ,  $p = 0.2521$ ). L) % clay ( $\chi^2 = 18.015$ ,  $p < 0.001$ ).  
 1160

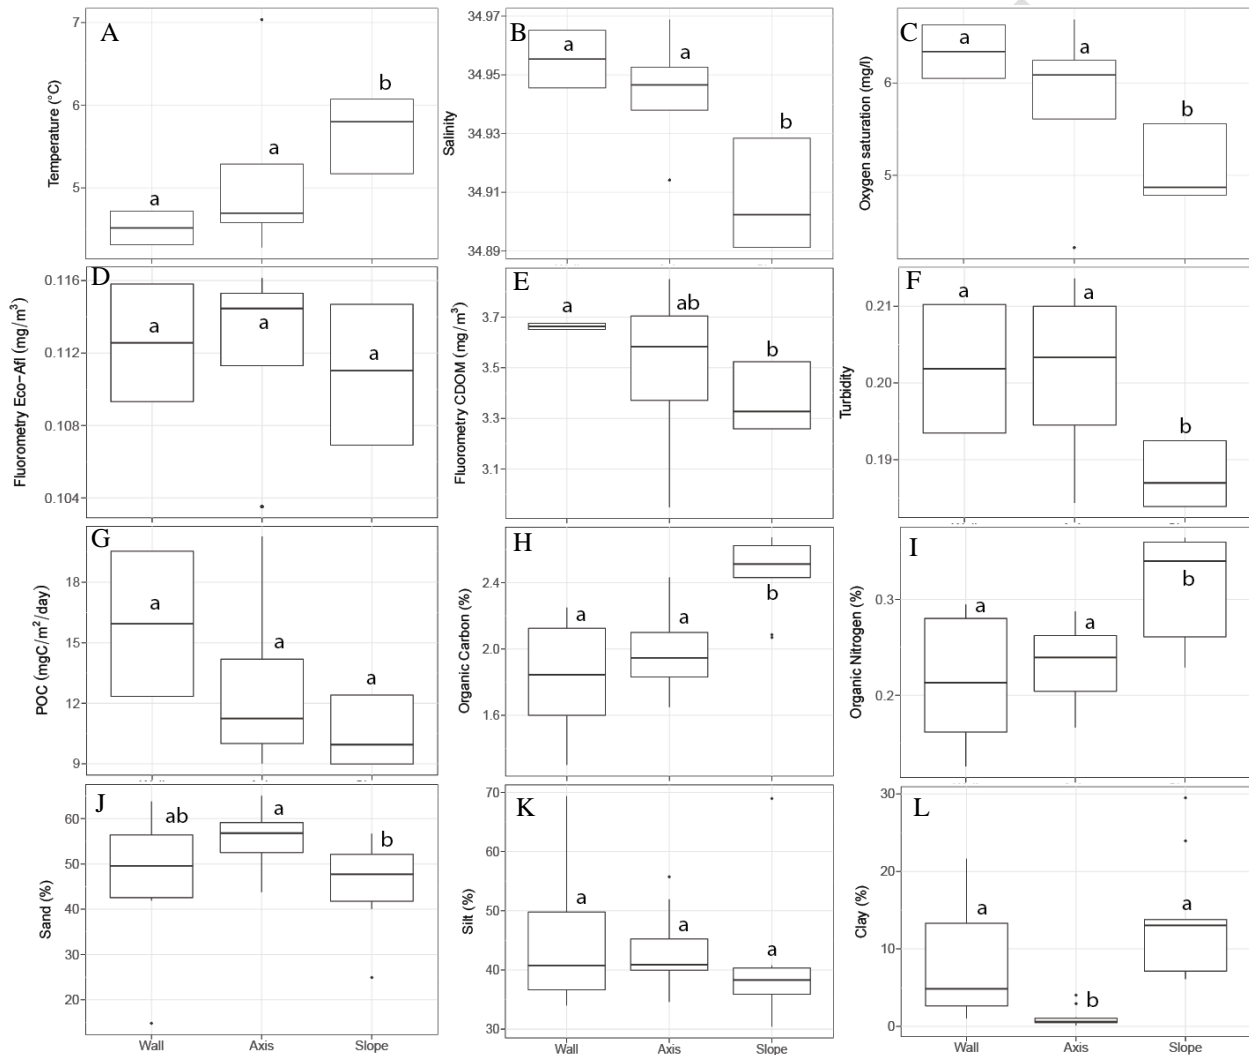

### Macrofauna of DeSoto Canyon and adjacent slope

1161

1162 Figure 9. Non-metric multidimensional scaling of group II canyon axis and wall sites at depths of 669 –  
1163 1510 m compared to slope sites at 771 – 978 m.

1164

1165

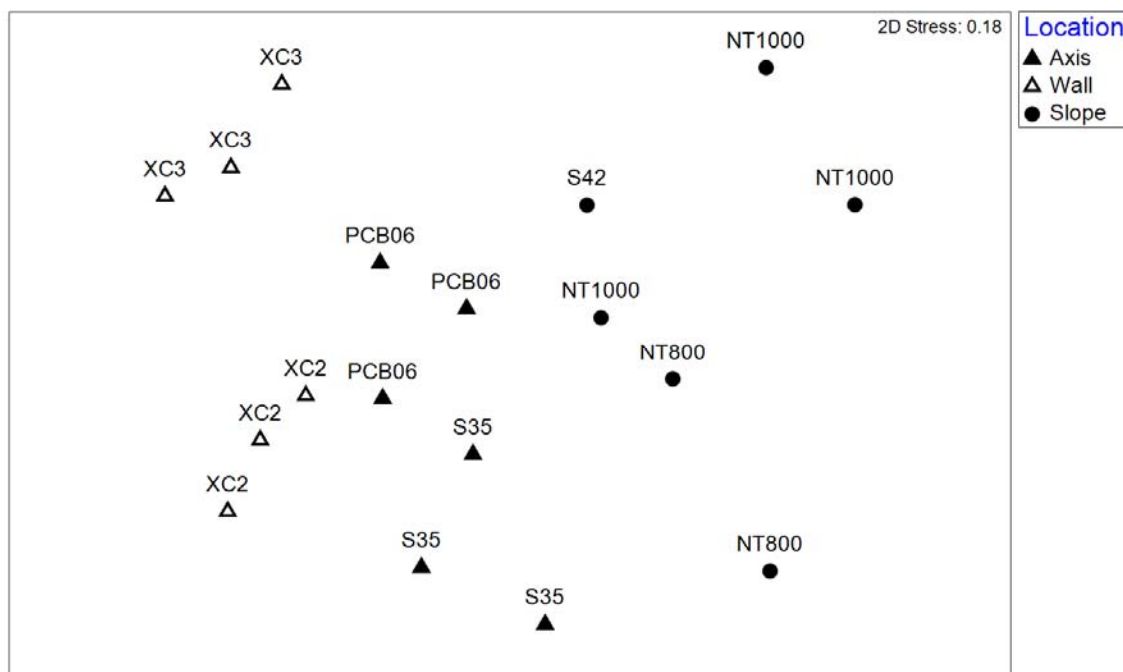

PREPRINT

### Macrofauna of DeSoto Canyon and adjacent slope

1166 Figure 10. dbRDA plots of the canyon at 669 – 1834 m compared to the adjacent slope at 771 – 978 m.

1167

1168

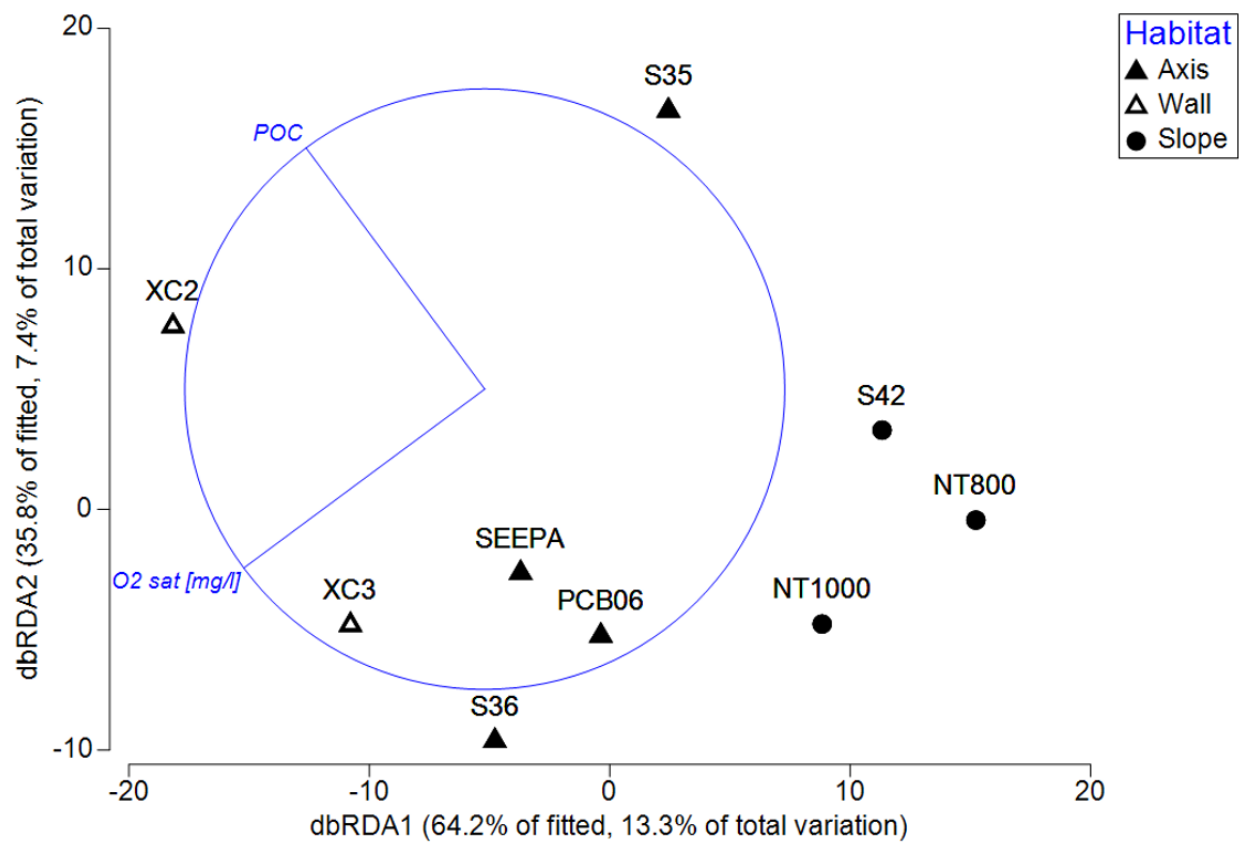

PRELIMINARY
